# Supplementary material for: Characterization of Three Novel 4-Methylaminorex Derivatives Applied as Designer Drugs
Source: MDPI journal article supplement (doi:10.3390/molecules27185770), 2022-09-06
Supplement: s1 [file s1]

Article

# Characterization of Three Novel 4-Methylaminorex Derivatives Applied as Designer Drugs

Elisabeth Seibert <sup>1</sup>, Olaf Kunert <sup>1</sup>, Eva-Maria Pferschy-Wenzig <sup>2</sup> and Martin G. Schmid <sup>1,\*</sup>

<sup>1</sup> Department of Pharmaceutical Chemistry, Institute of Pharmaceutical Sciences, University of Graz, Schubertstraße 1, 8010 Graz, Austria

<sup>2</sup> Department of Pharmacognosy, Institute of Pharmaceutical Sciences, University of Graz, Beethovenstraße 8, 8010 Graz, Austria

\* Correspondence: martin.schmid@uni-graz.at

## 1. Supplementary materials

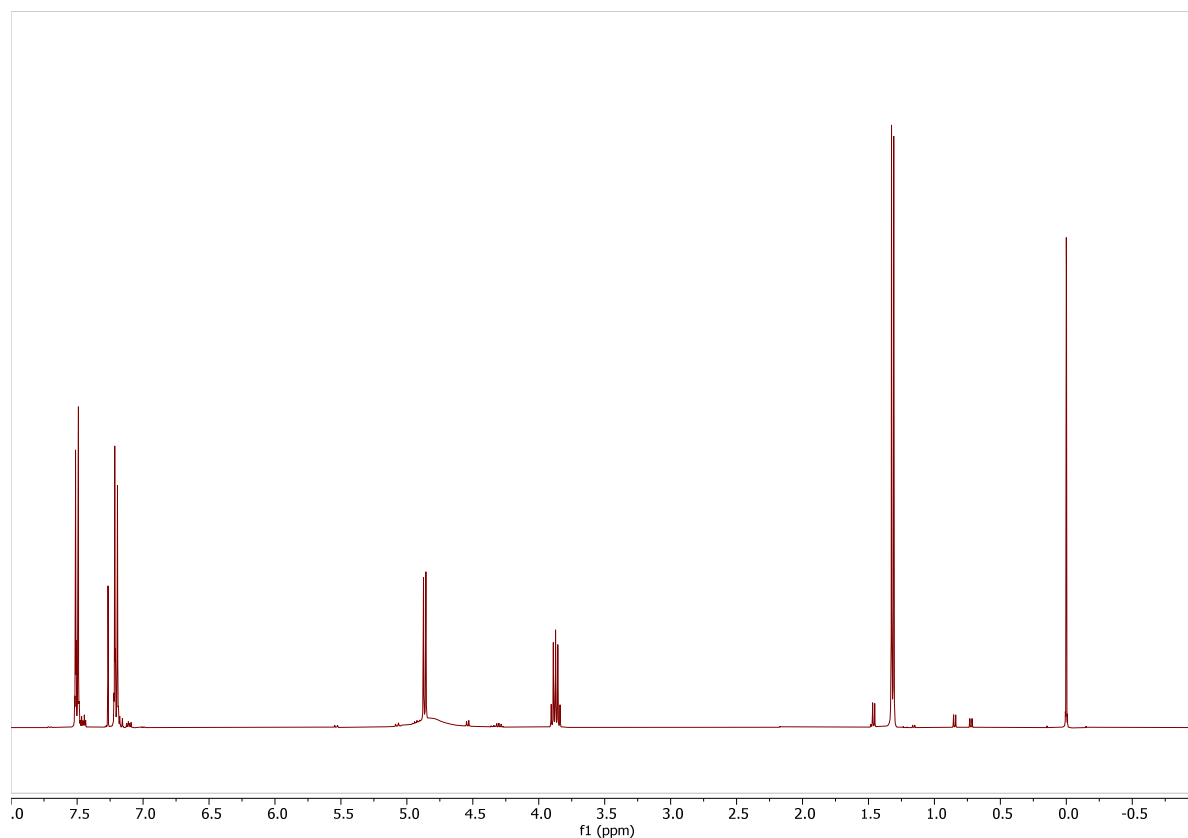

**Figure S1.** Proton NMR spectrum (400 MHz,  $\text{CDCl}_3$ ) 4B-MAR.

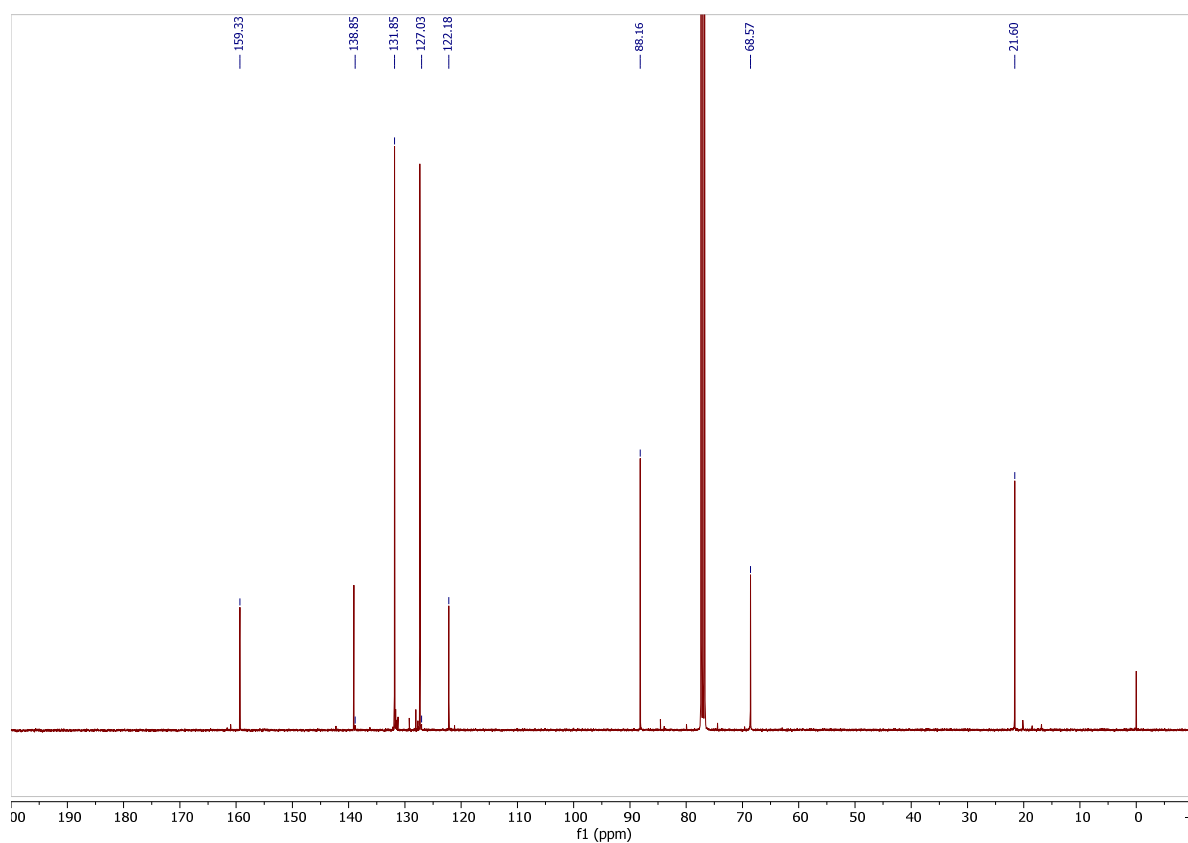

**Figure S2.** Carbon NMR spectrum (100 MHz,  $\text{CDCl}_3$ ) 4B-MAR.

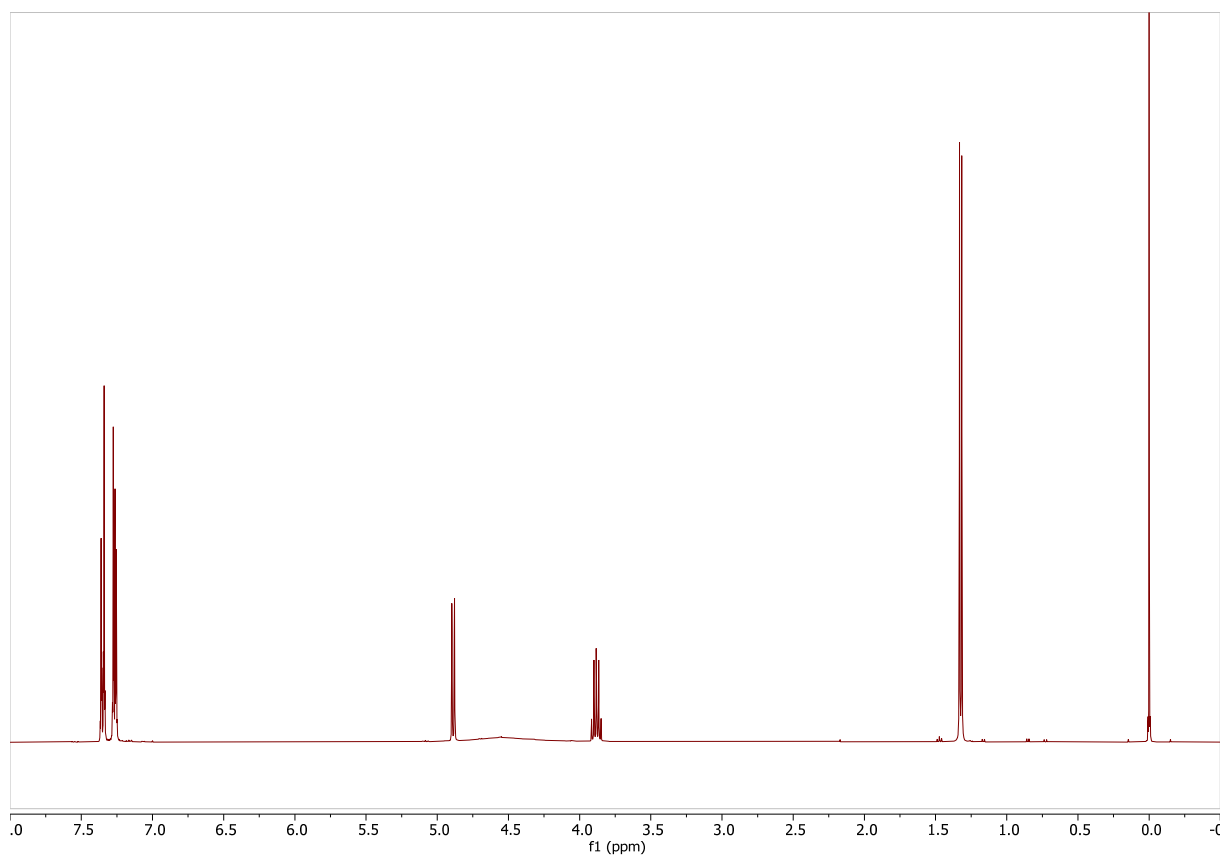

**Figure S3.** Proton NMR spectrum (400 MHz,  $\text{CDCl}_3$ ) 4C-MAR.

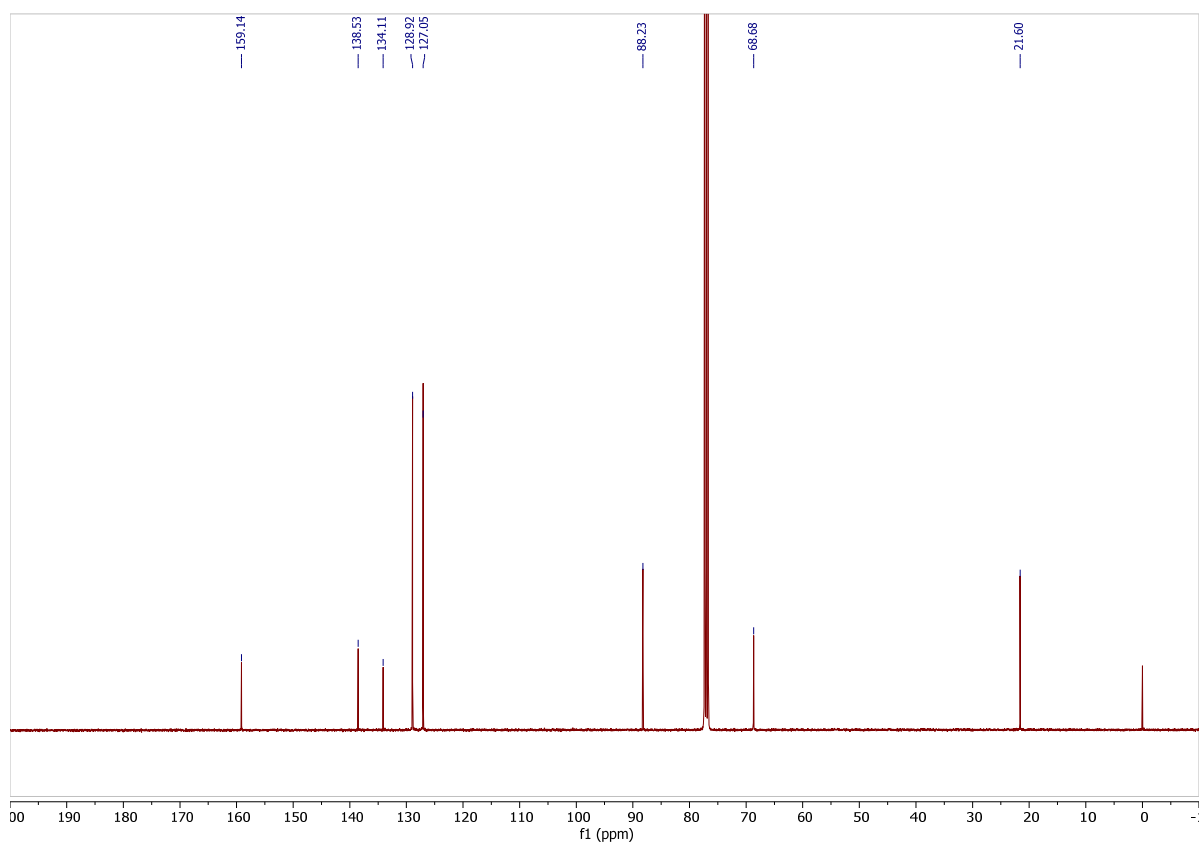

**Figure S4.** Carbon NMR spectrum (100 MHz,  $\text{CDCl}_3$ ) 4C-MAR.

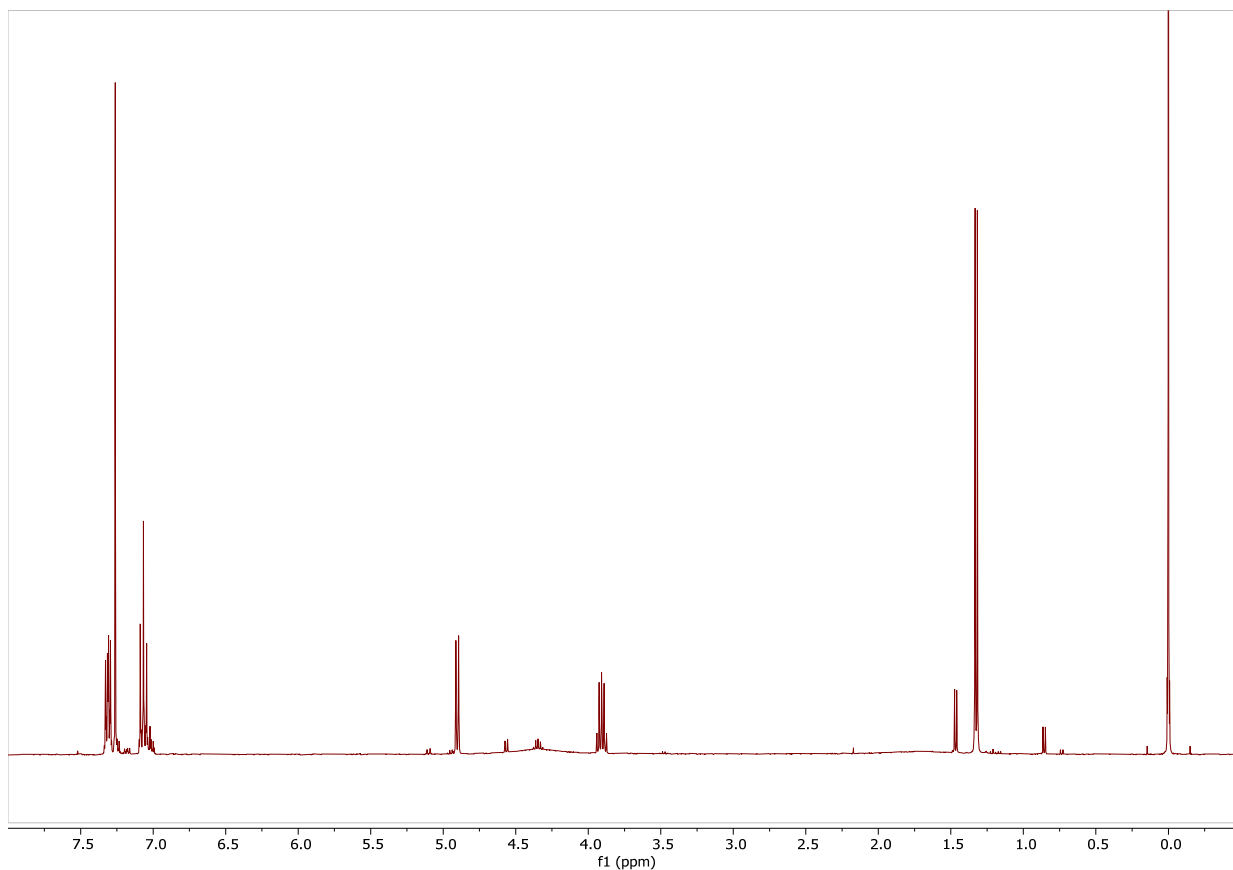

**Figure S5.** Proton NMR spectrum (400 MHz,  $\text{CDCl}_3$ ) 4F-MAR.

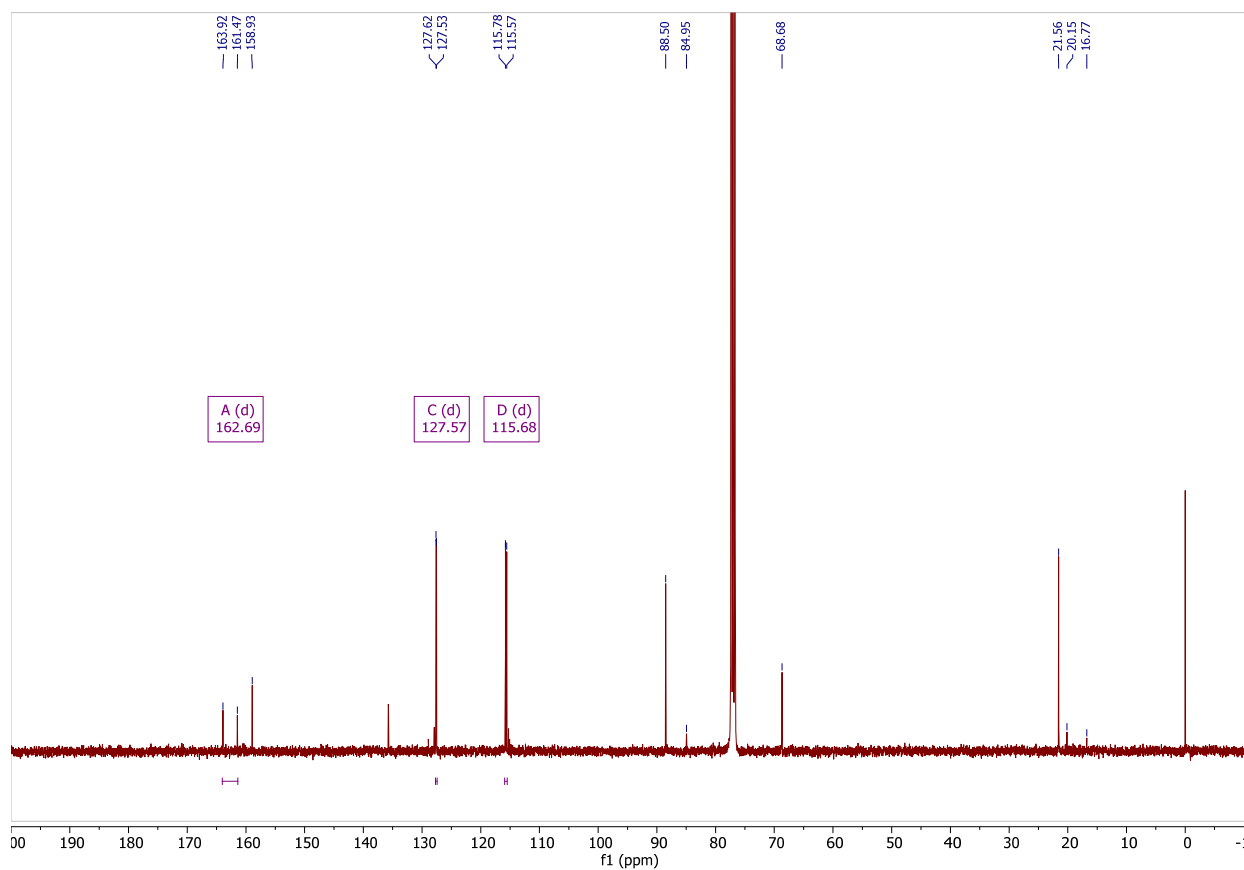

**Figure S6.** Carbon NMR spectrum (100 MHz,  $\text{CDCl}_3$ ) 4F-MAR. The centers of the doublets caused by heteronuclear  $^{19}\text{F}$ ,  $^{13}\text{C}$ - $J$ -couplings are given in the boxes.

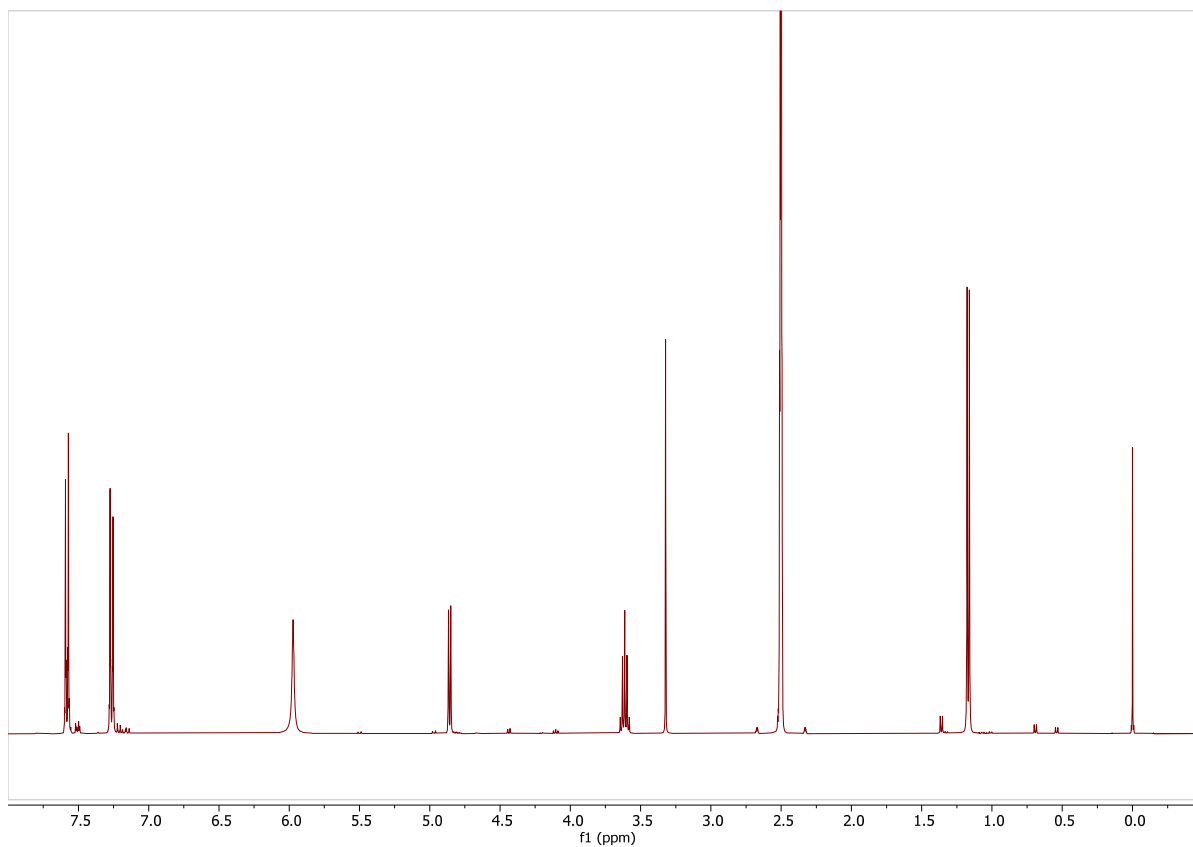

Figure S7. Proton NMR spectrum (400 MHz, DMSO-d<sub>6</sub>) 4B-MAR.

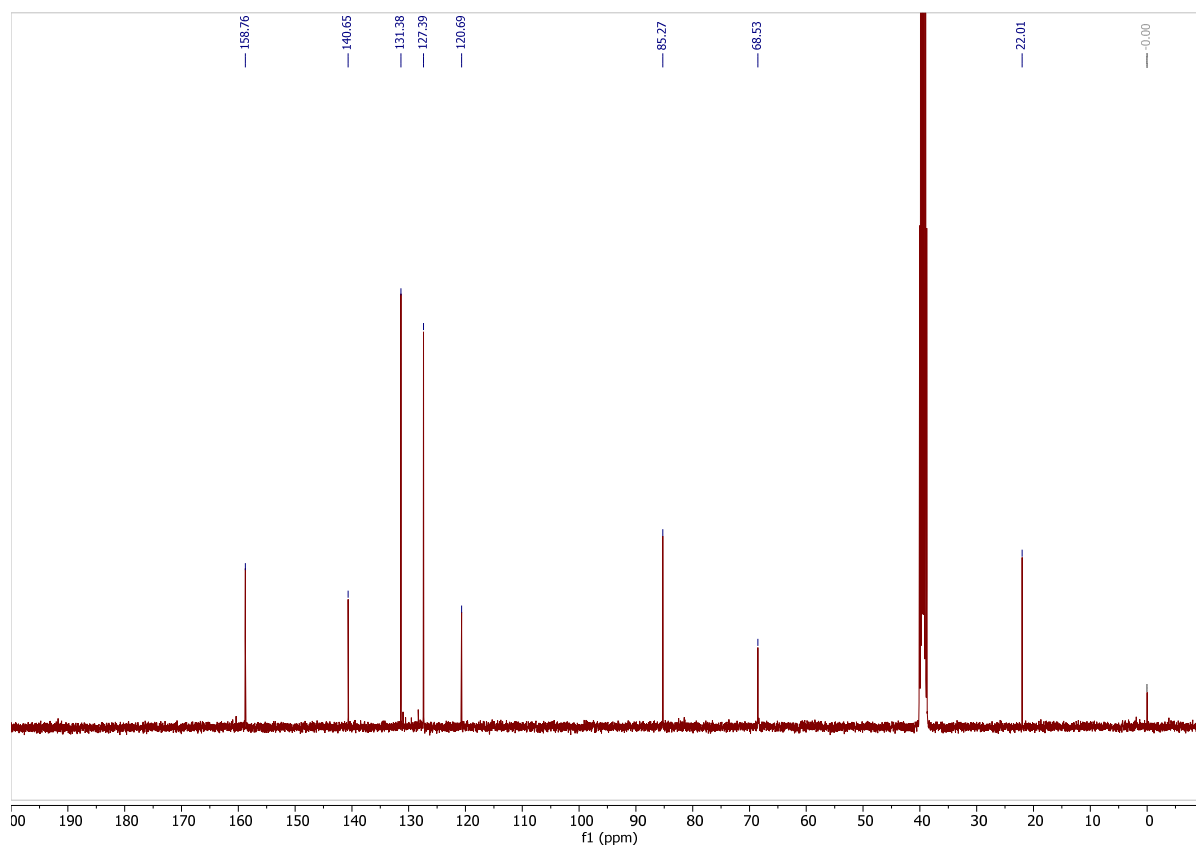

Figure S8. Carbon NMR spectrum (100 MHz, DMSO-d<sub>6</sub>) 4B-MAR.

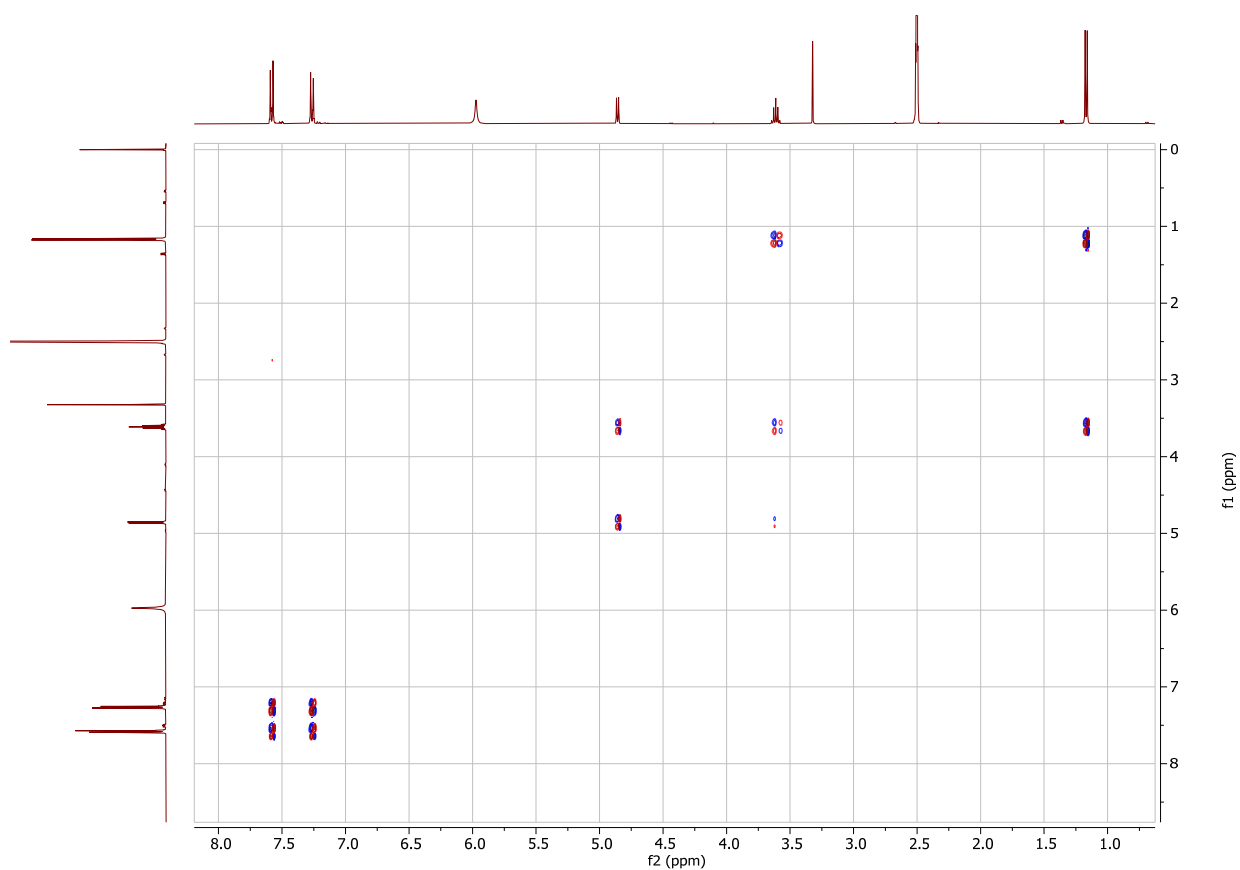

Figure S9. DQF-COSY NMR spectrum (400 MHz, DMSO-d<sub>6</sub>) 4B-MAR.

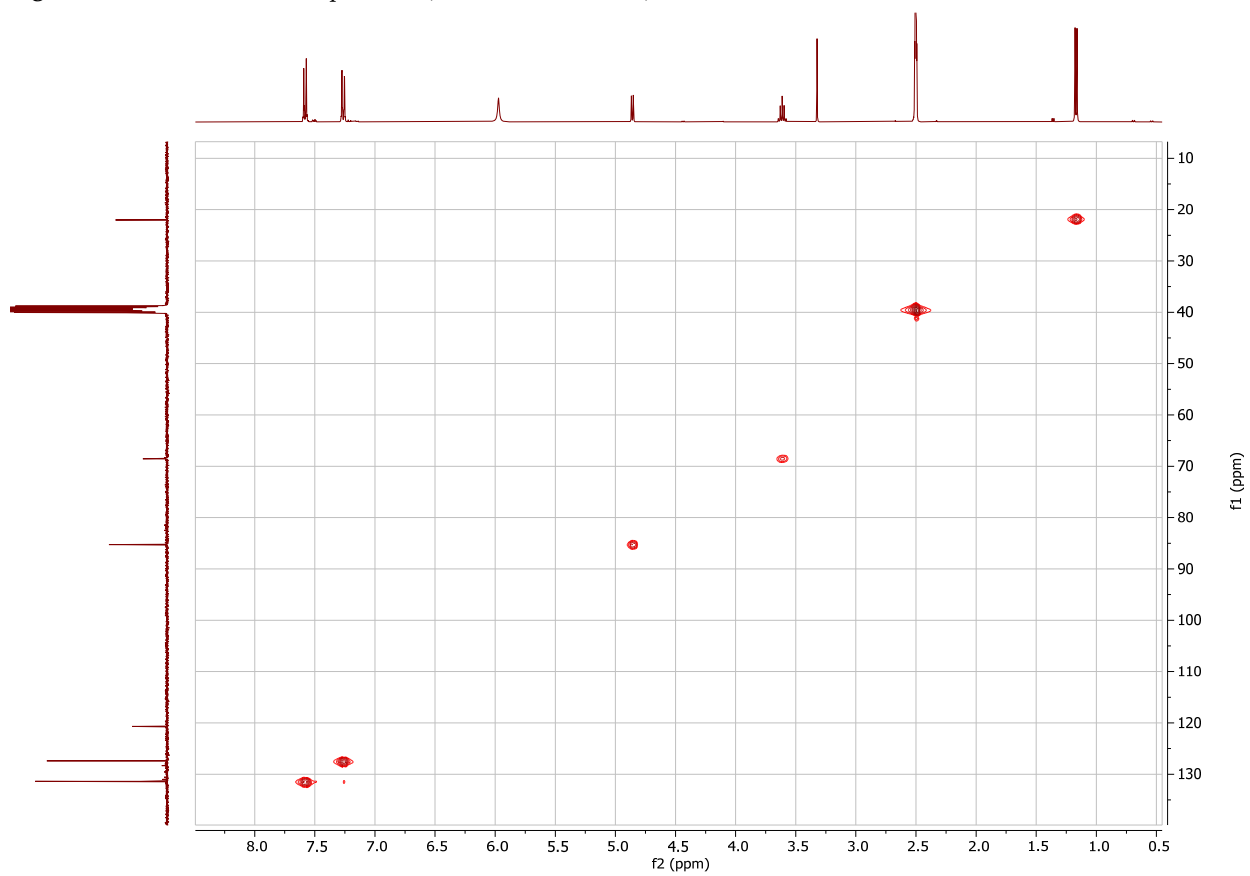

Figure S10. HSQC NMR spectrum (100/400 MHz, DMSO-d<sub>6</sub>) 4B-MAR.

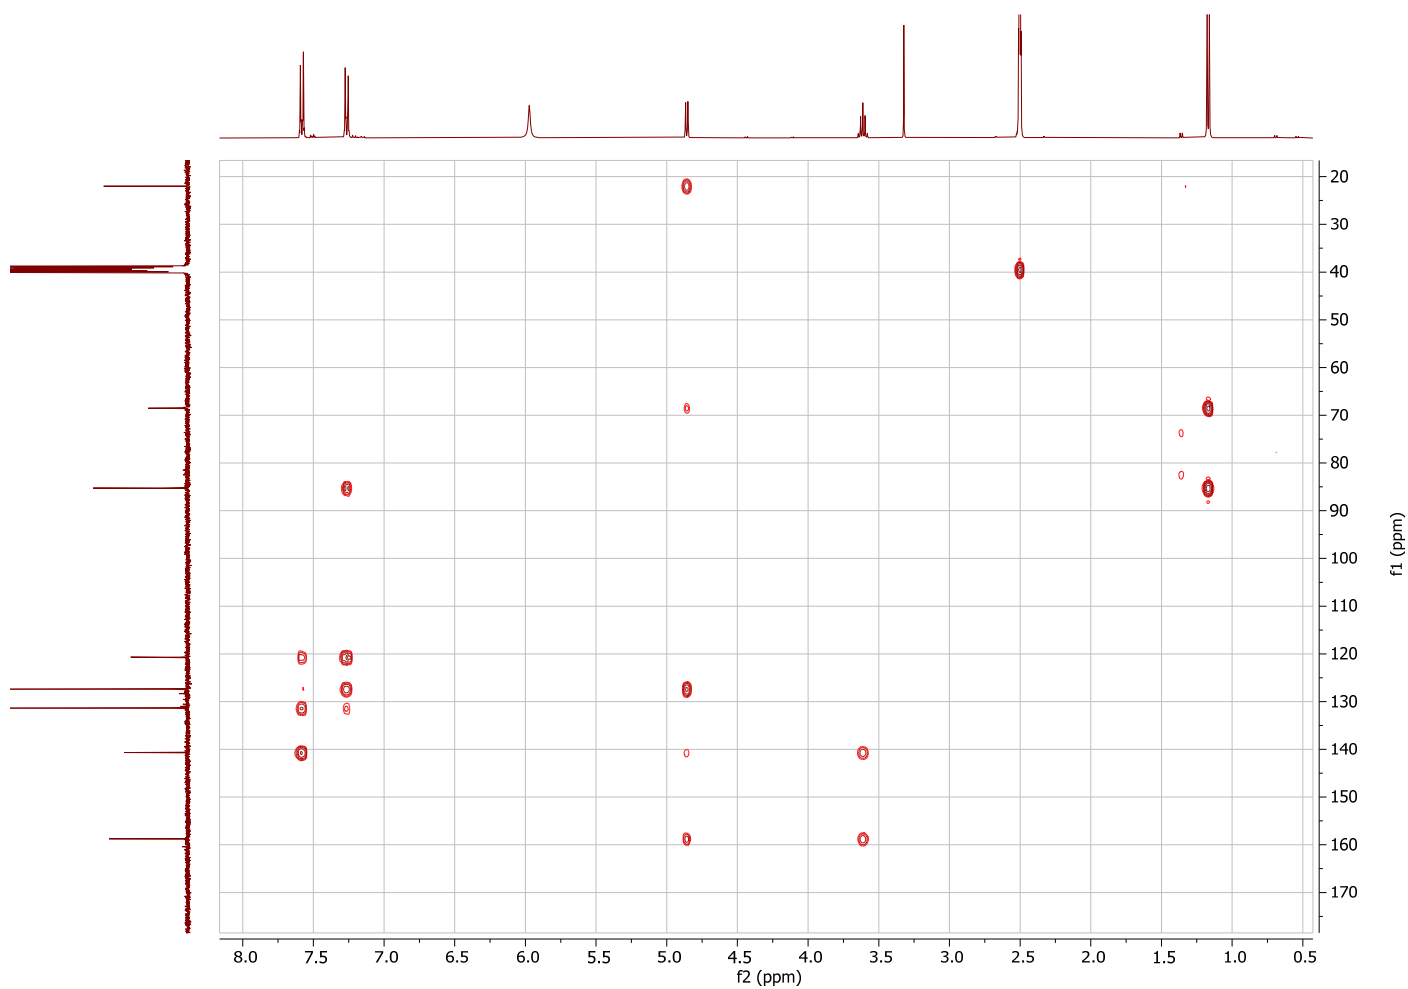

Figure S11. HMBC NMR spectrum (100/400 MHz, DMSO-d<sub>6</sub>) 4B-MAR.

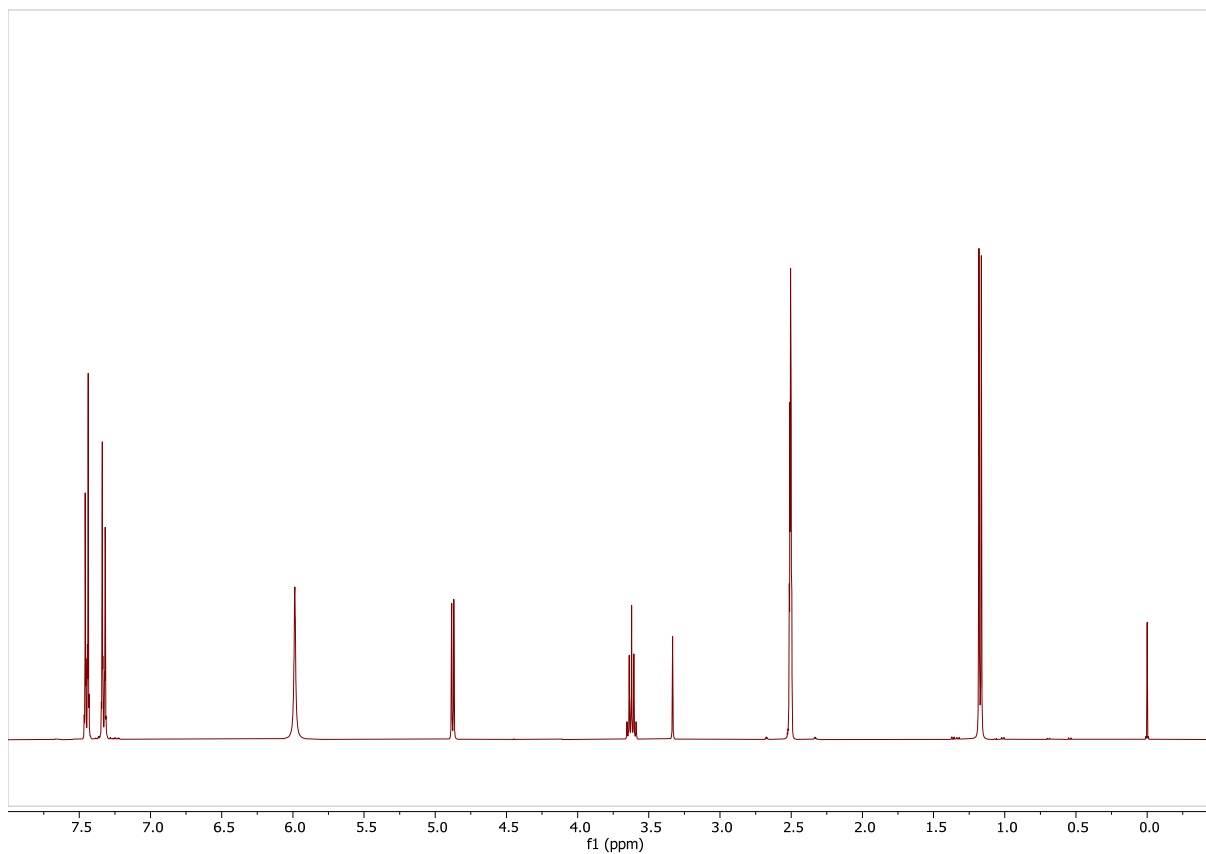

Figure S12. Proton NMR spectrum (400 MHz, DMSO-d<sub>6</sub>) 4C-MAR.

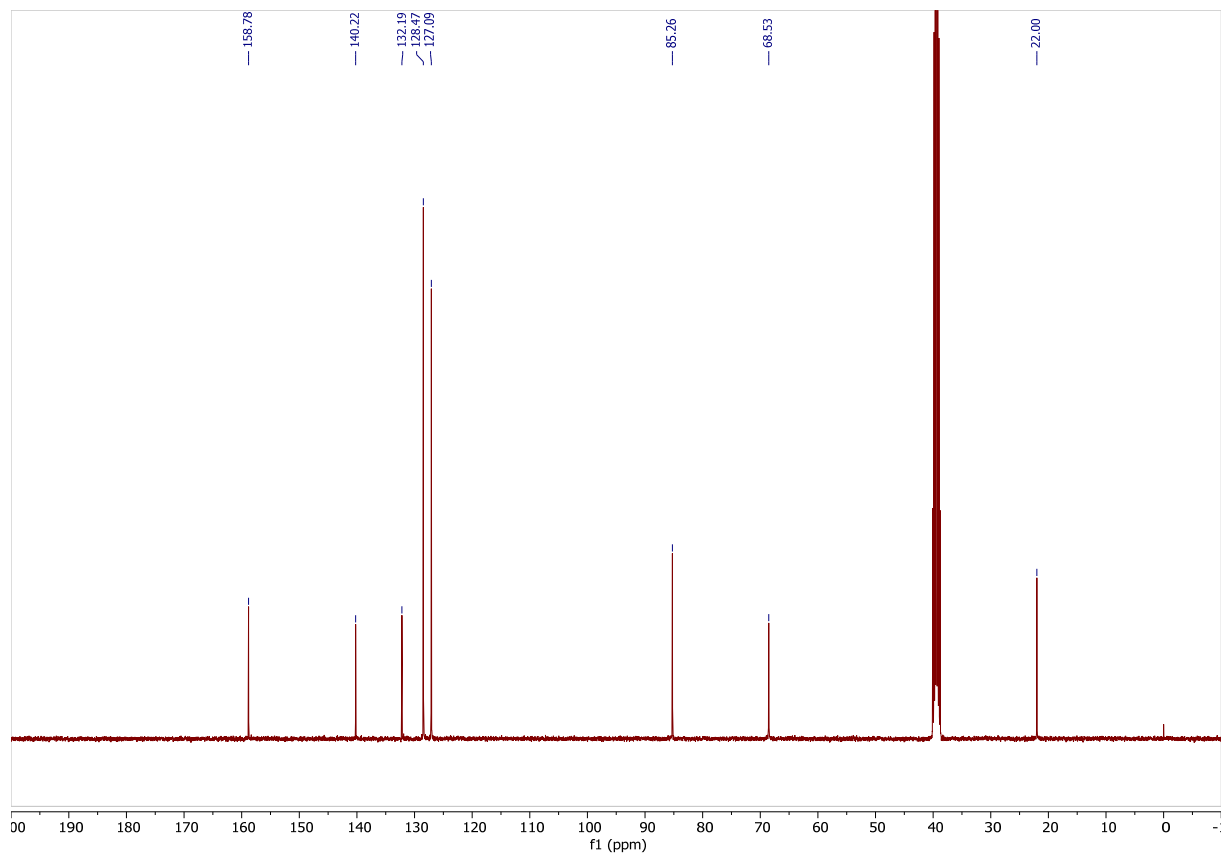

Figure S13. Carbon NMR spectrum (100 MHz, DMSO-d<sub>6</sub>) 4C-MAR.

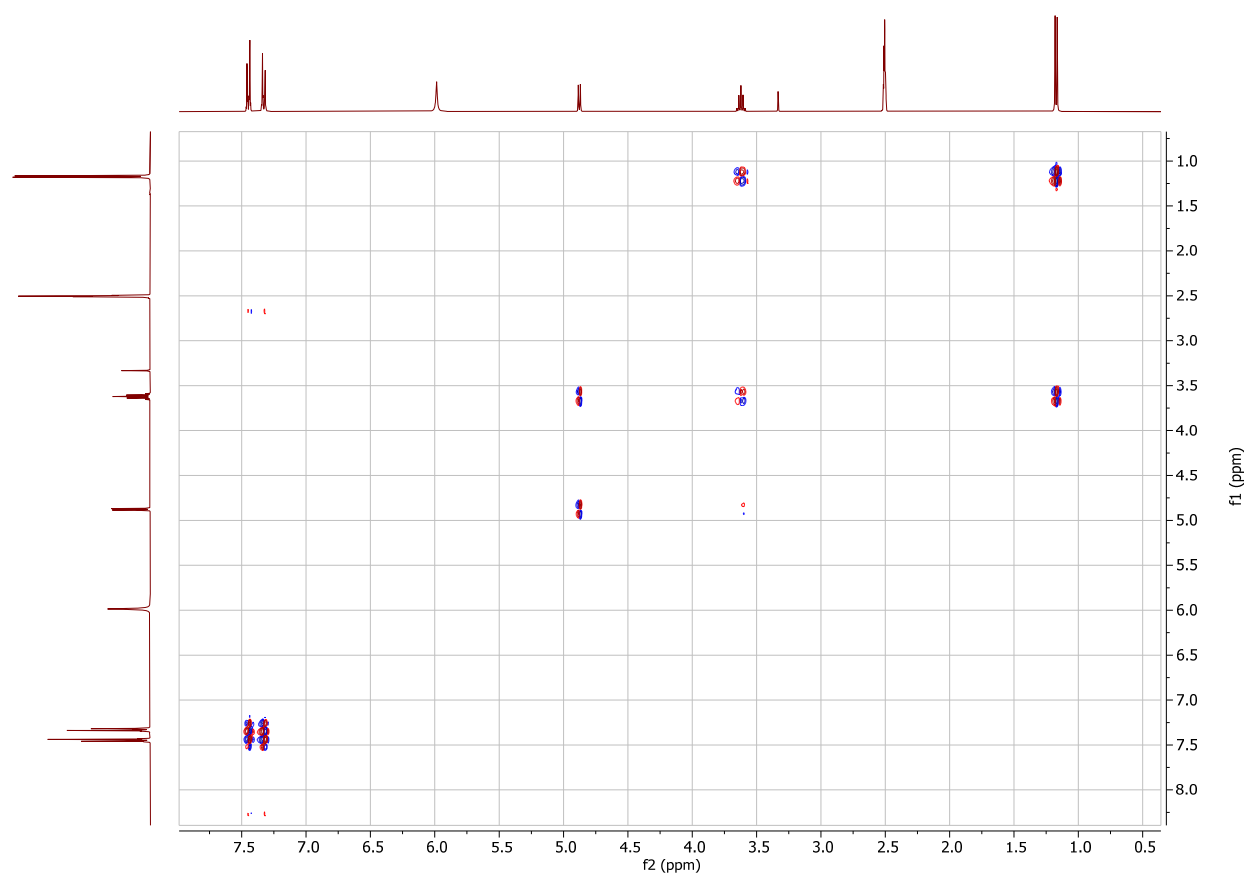

**Figure S14.** DQF-COSY NMR spectrum (400 MHz, DMSO-d<sub>6</sub>) 4C-MAR.

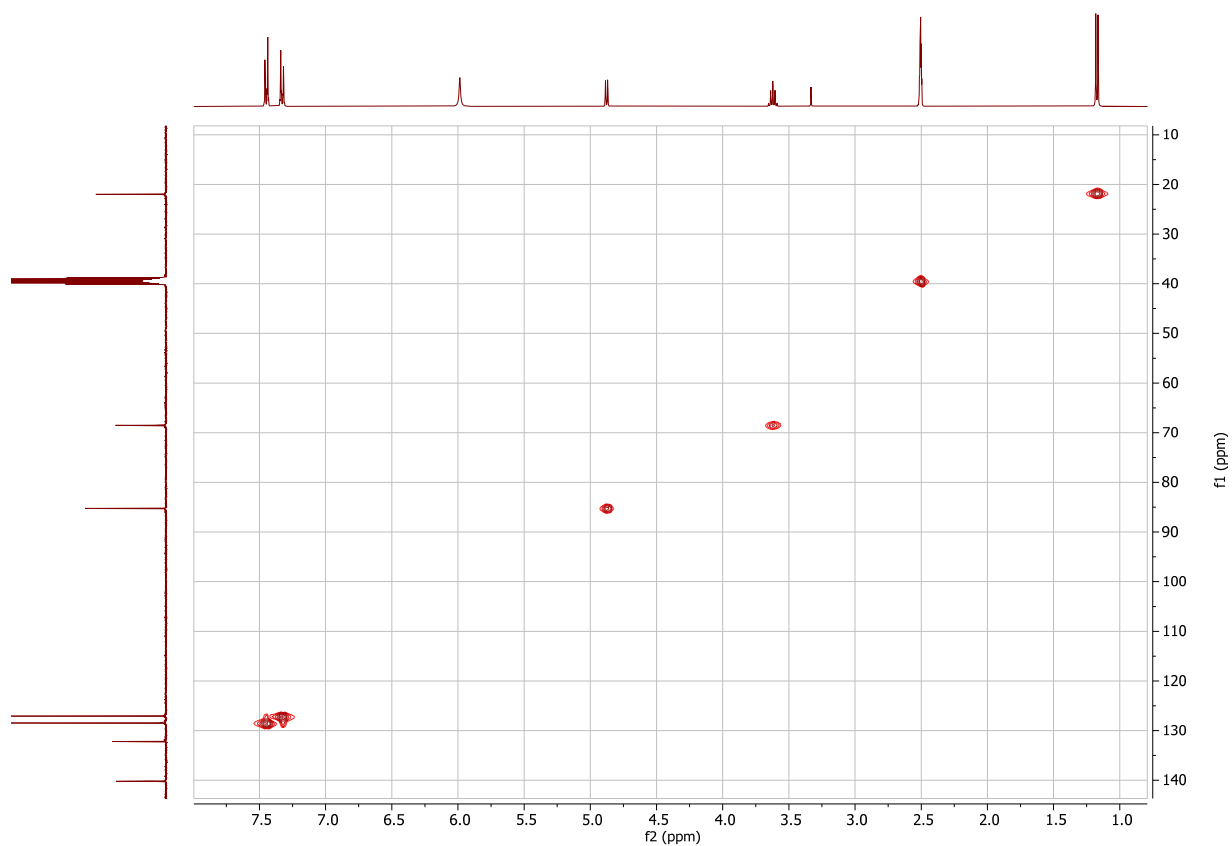

**Figure S15.** HSQC NMR spectrum (100/400 MHz, DMSO-d<sub>6</sub>) 4C-MAR.

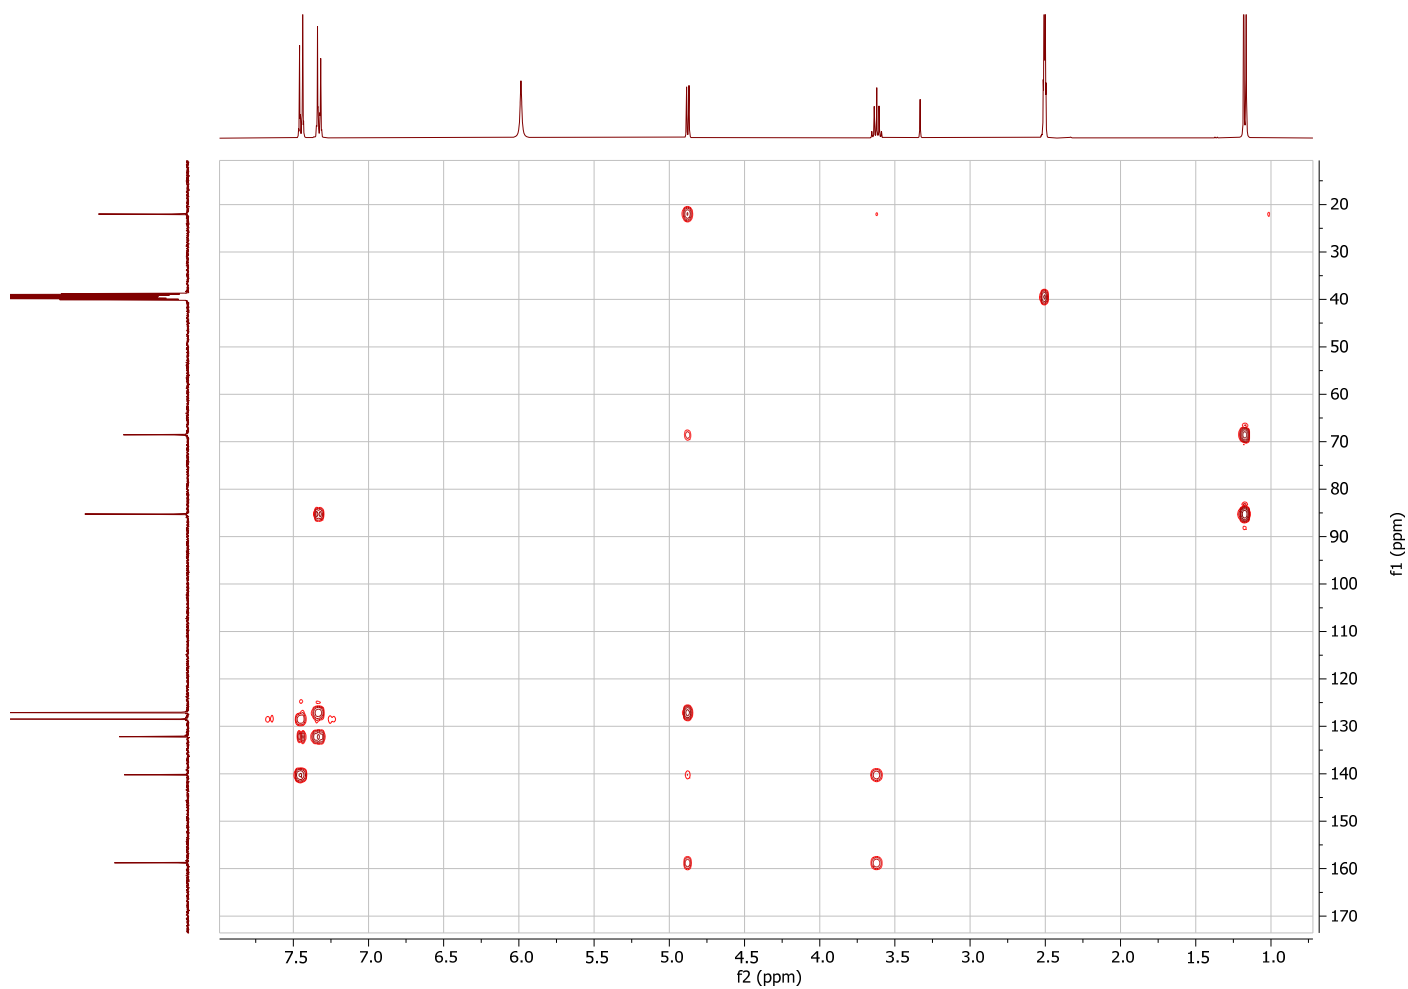

**Figure S16.** HMBC NMR spectrum (100/400 MHz, DMSO- $\text{d}_6$ ) 4C-MAR.

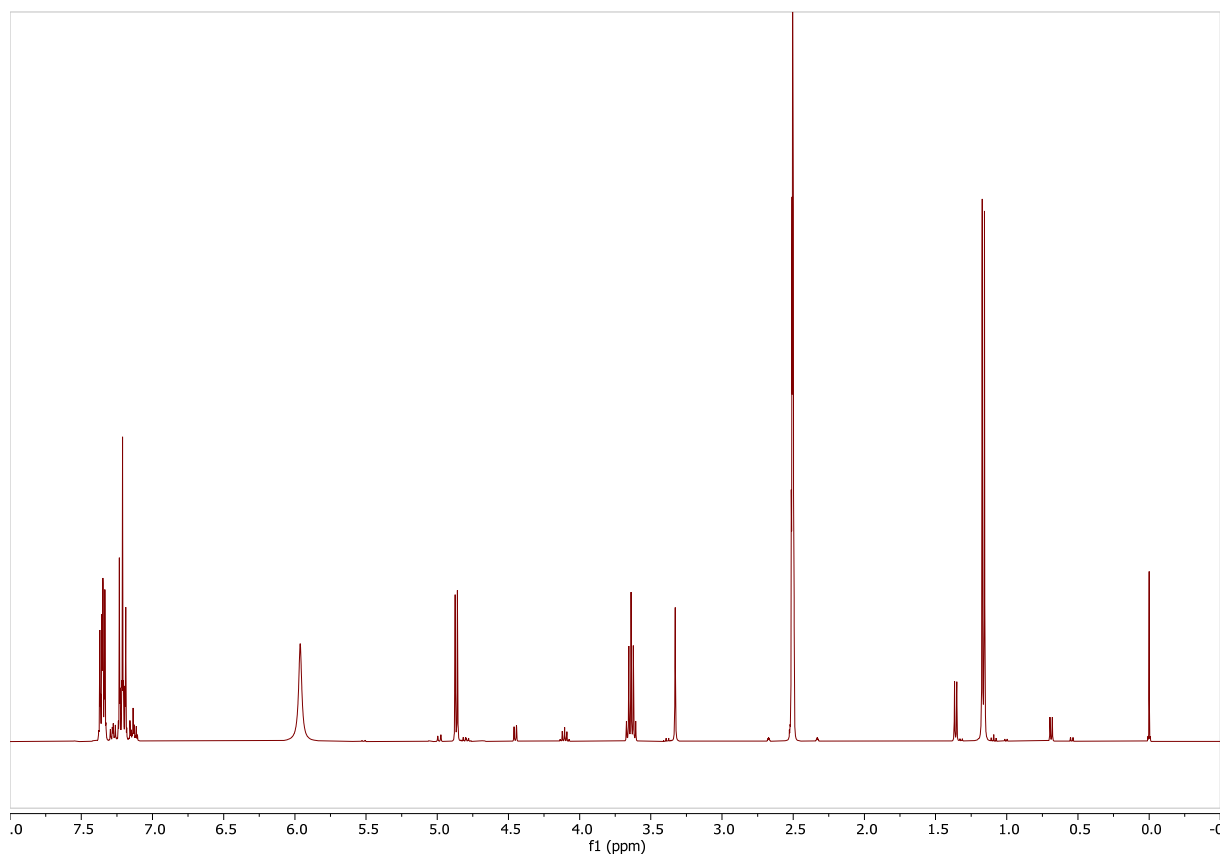

**Figure S17.** Proton NMR spectrum (400 MHz, DMSO- $d_6$ ) 4F-MAR.

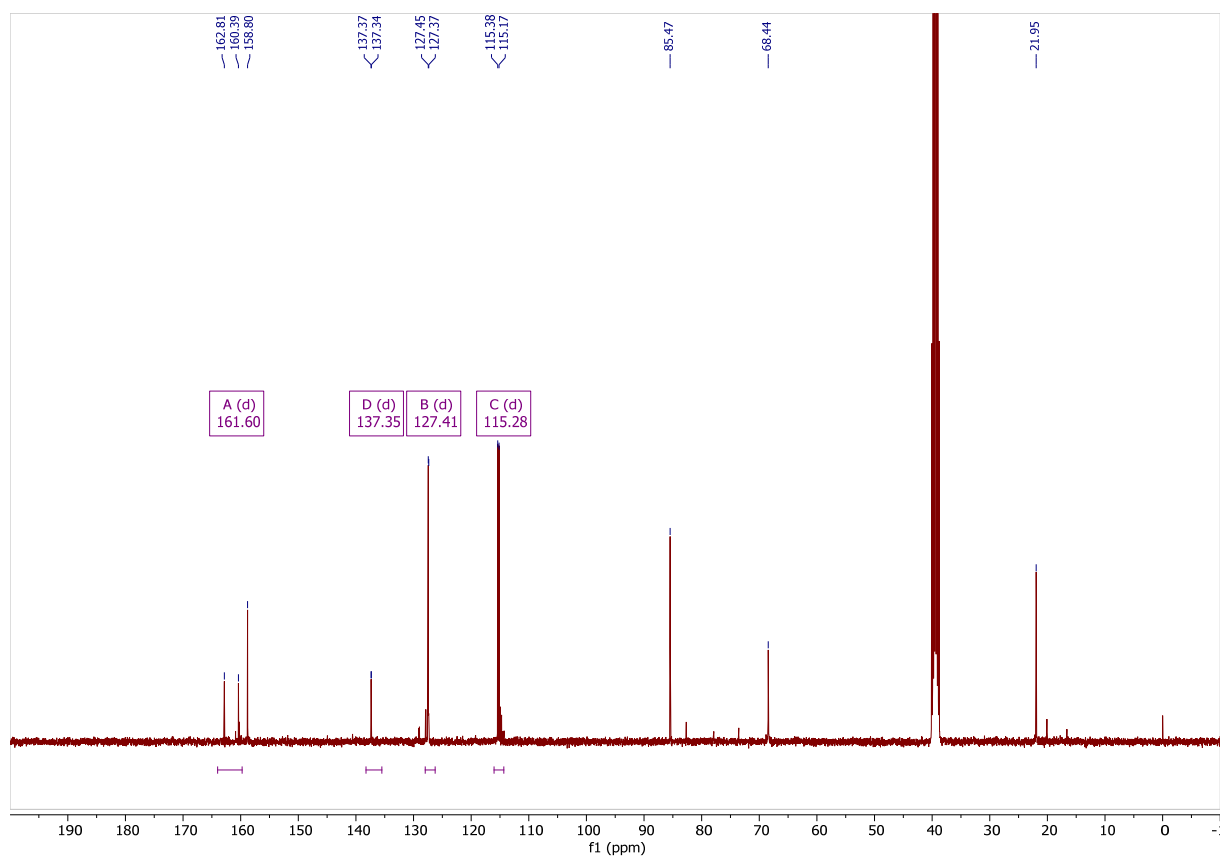

**Figure S18.** Carbon NMR spectrum (100 MHz, DMSO- $d_6$ ) 4F-MAR. The centers of the doublets caused by heteronuclear  $^{19}\text{F}$ ,  $^{13}\text{C}$ - $J$ -couplings are given in the boxes.

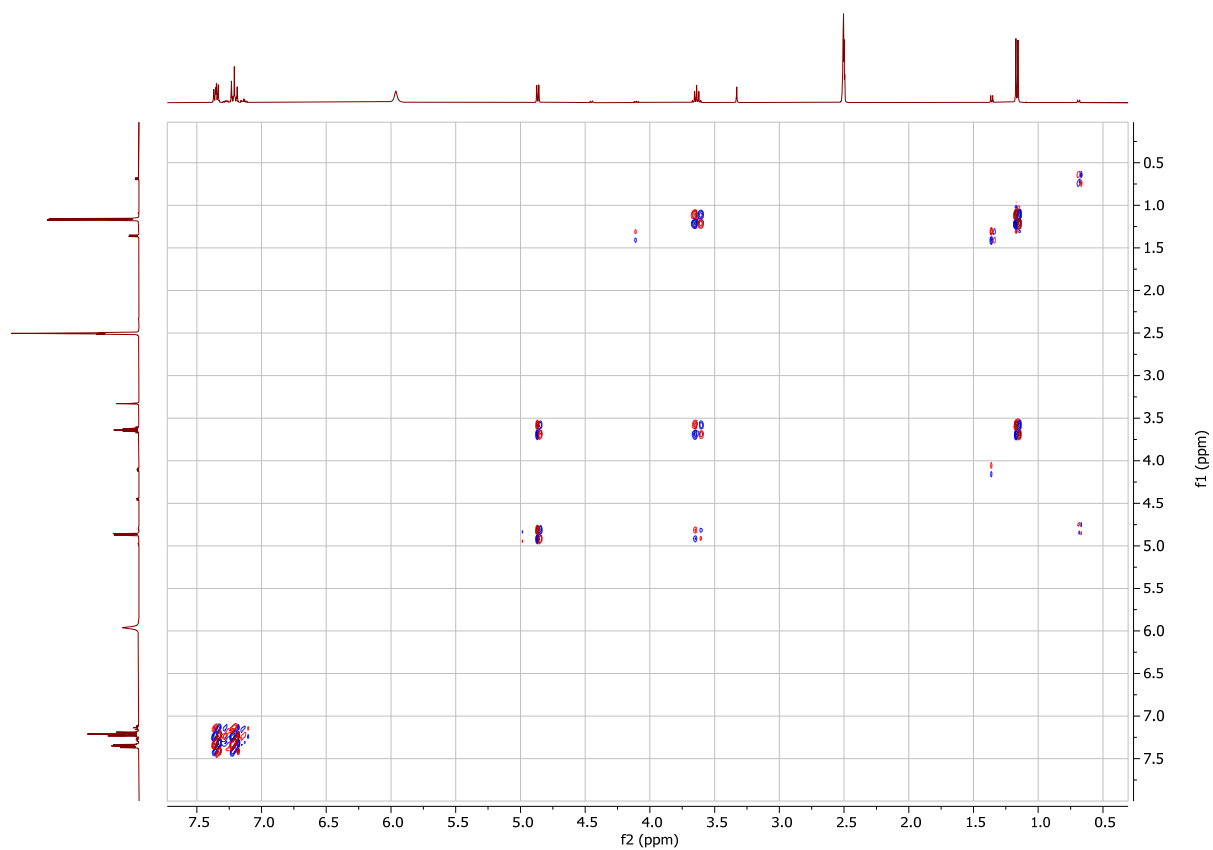

Figure S19. DQF-COSY NMR spectrum (400 MHz, DMSO-d<sub>6</sub>) 4F-MAR.

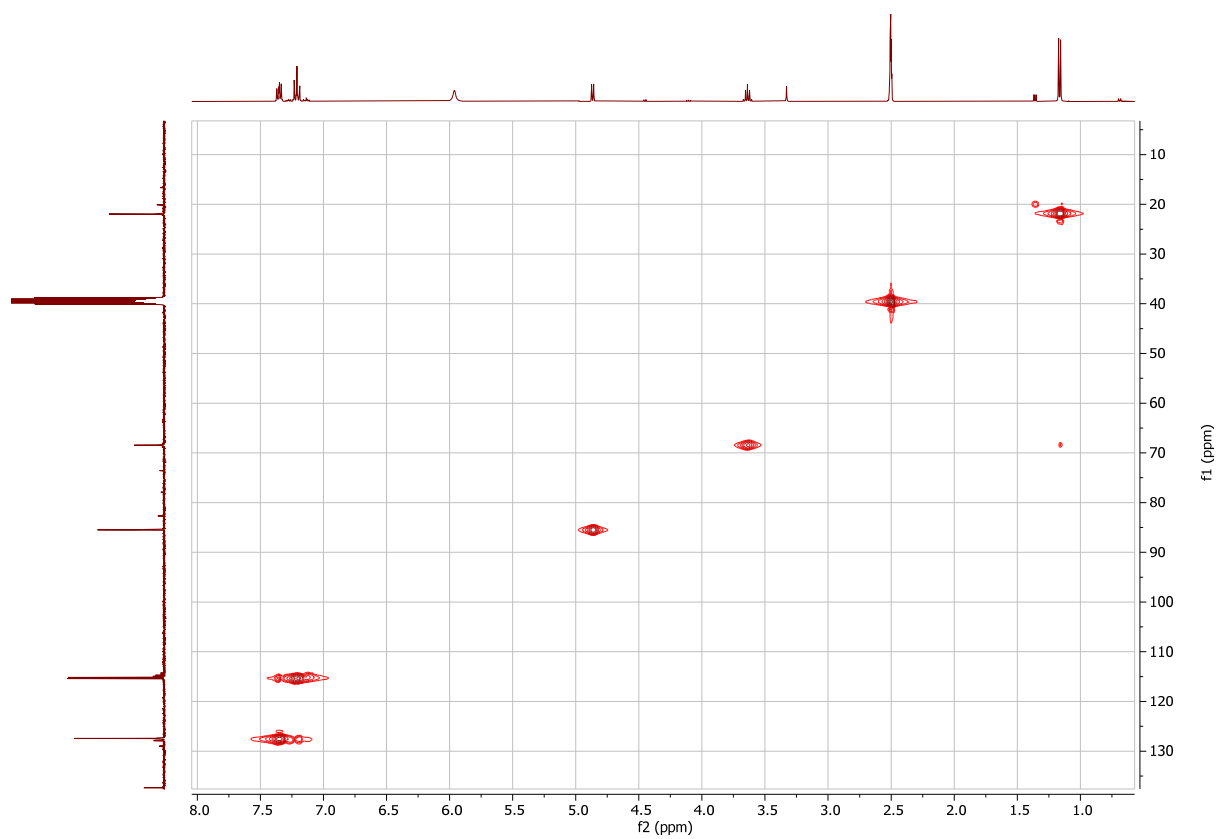

Figure S20. HSQC NMR spectrum (100/400 MHz, DMSO-d<sub>6</sub>) 4F-MAR.

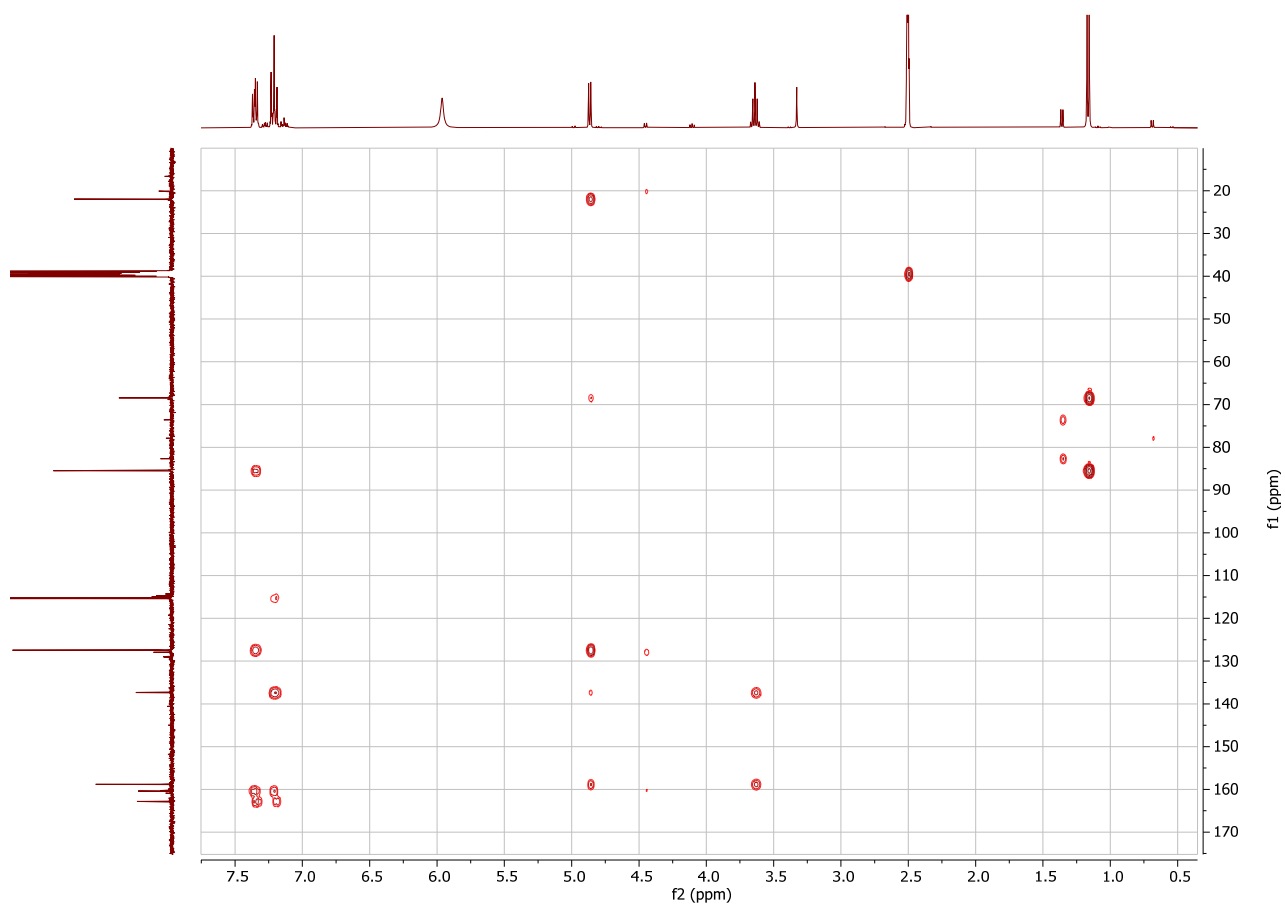

**Figure S21.** HMBC NMR spectrum (100/400 MHz, DMSO-d<sub>6</sub>) 4F-MAR.

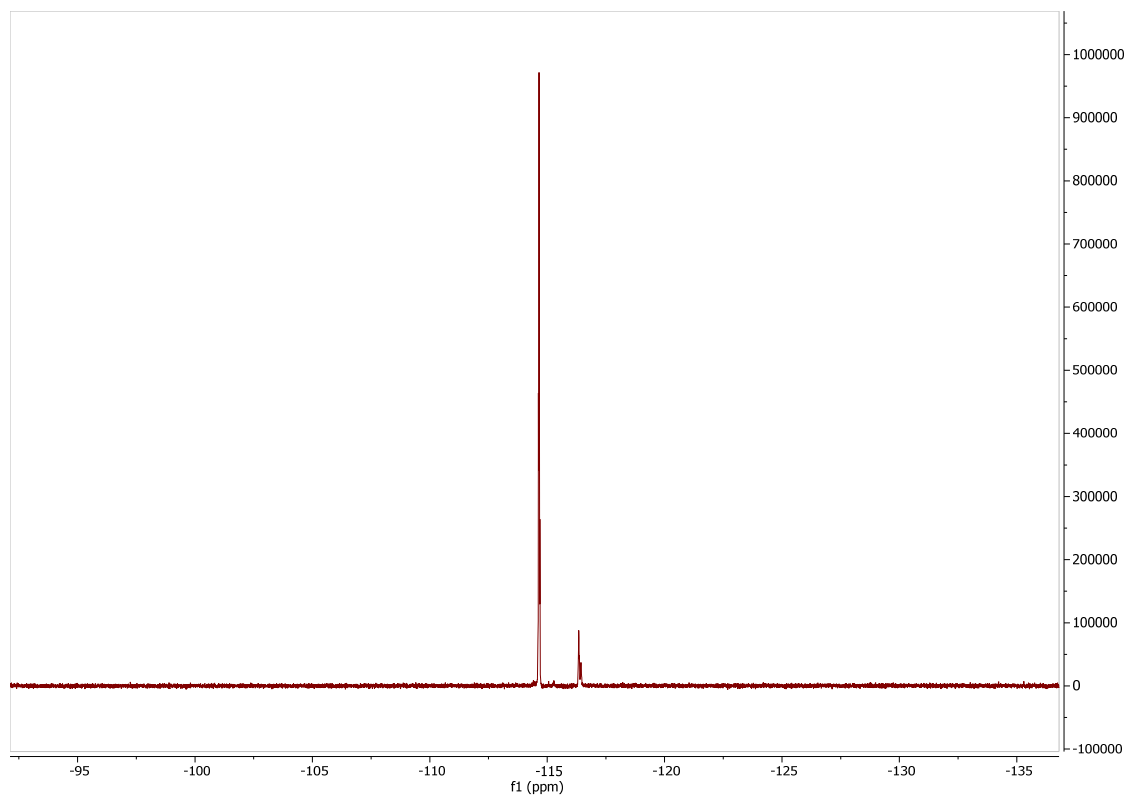

**Figure S22.** <sup>19</sup>F NMR spectrum (377 MHz, DMSO-d<sub>6</sub>) 4F-MAR

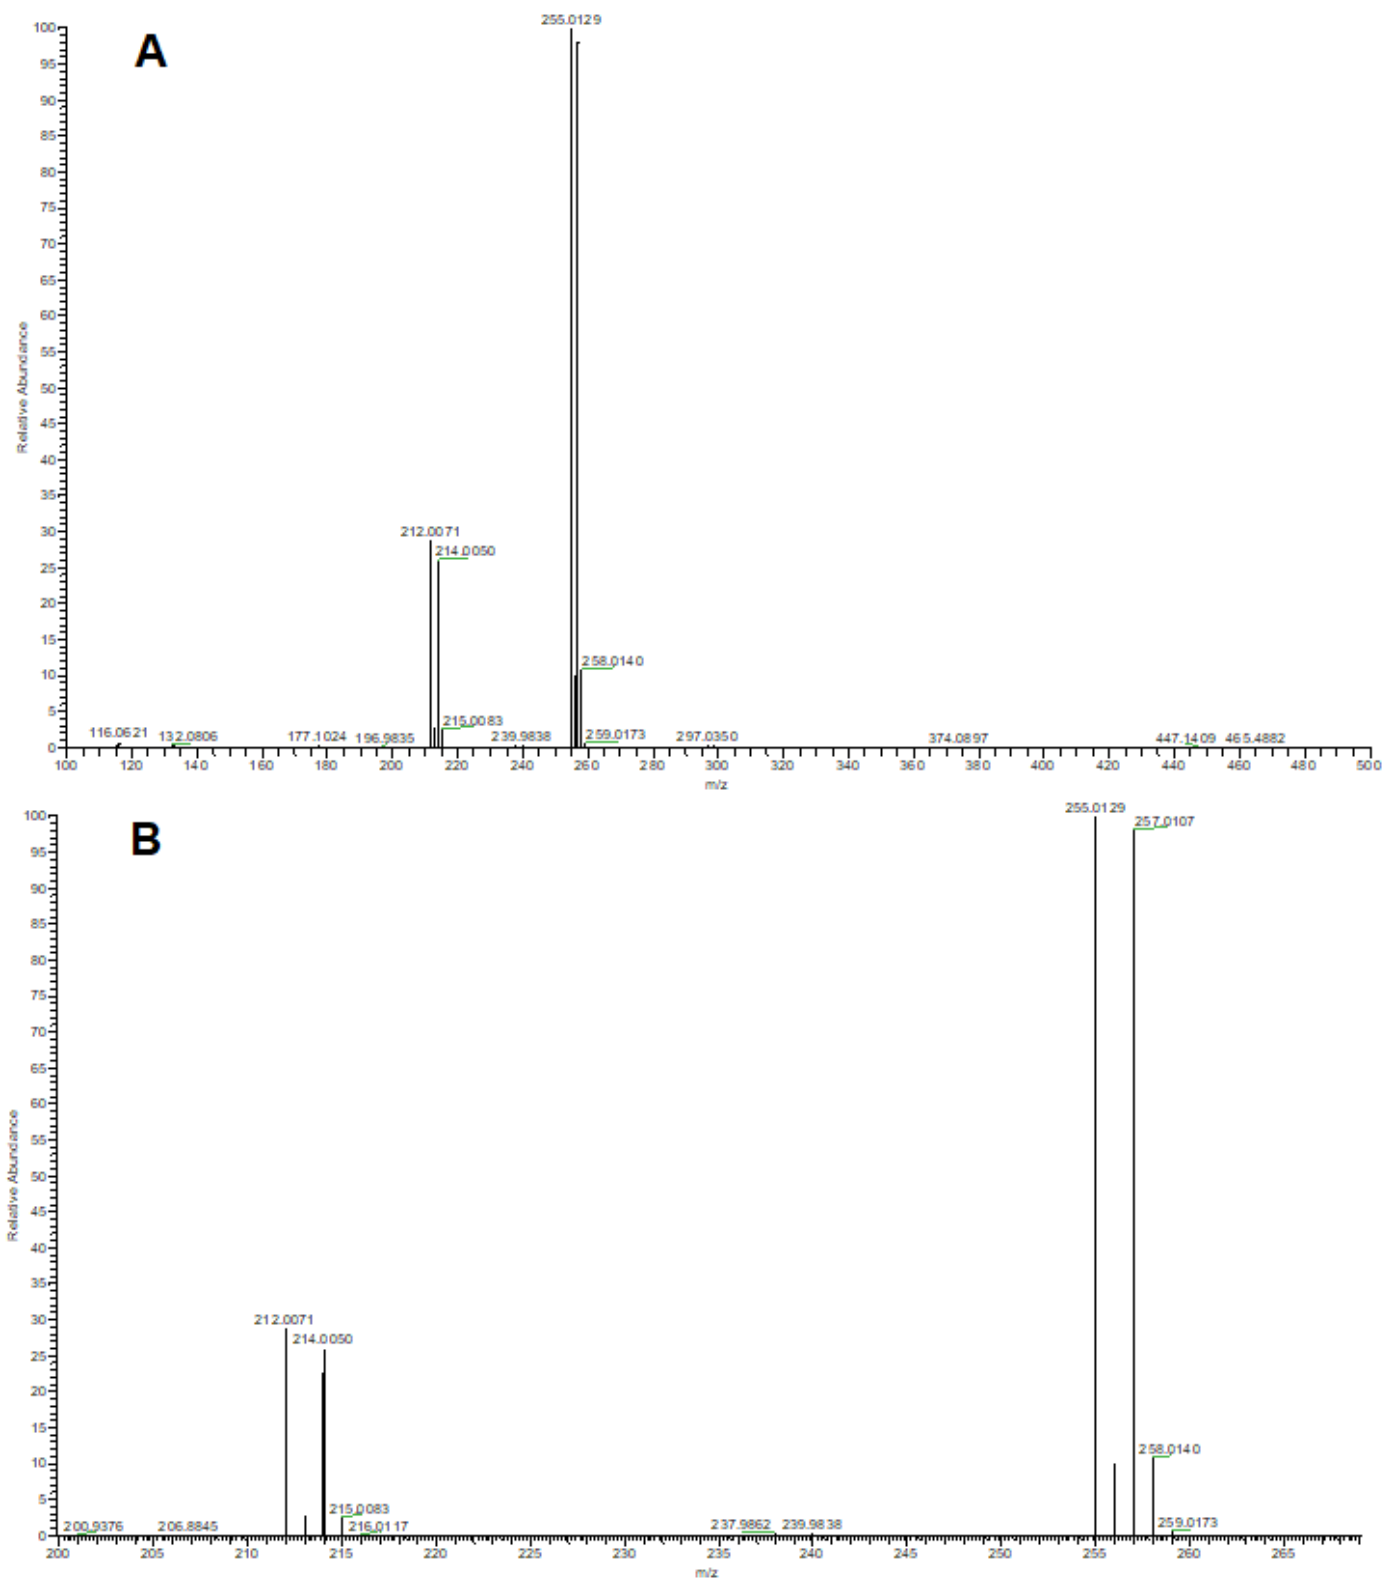

**Figure S23.** HESI positive mode full MS spectrum of 4B-MAR (A: full view,  $m/z$  100-500, B: detailed view,  $m/z$  200-270)

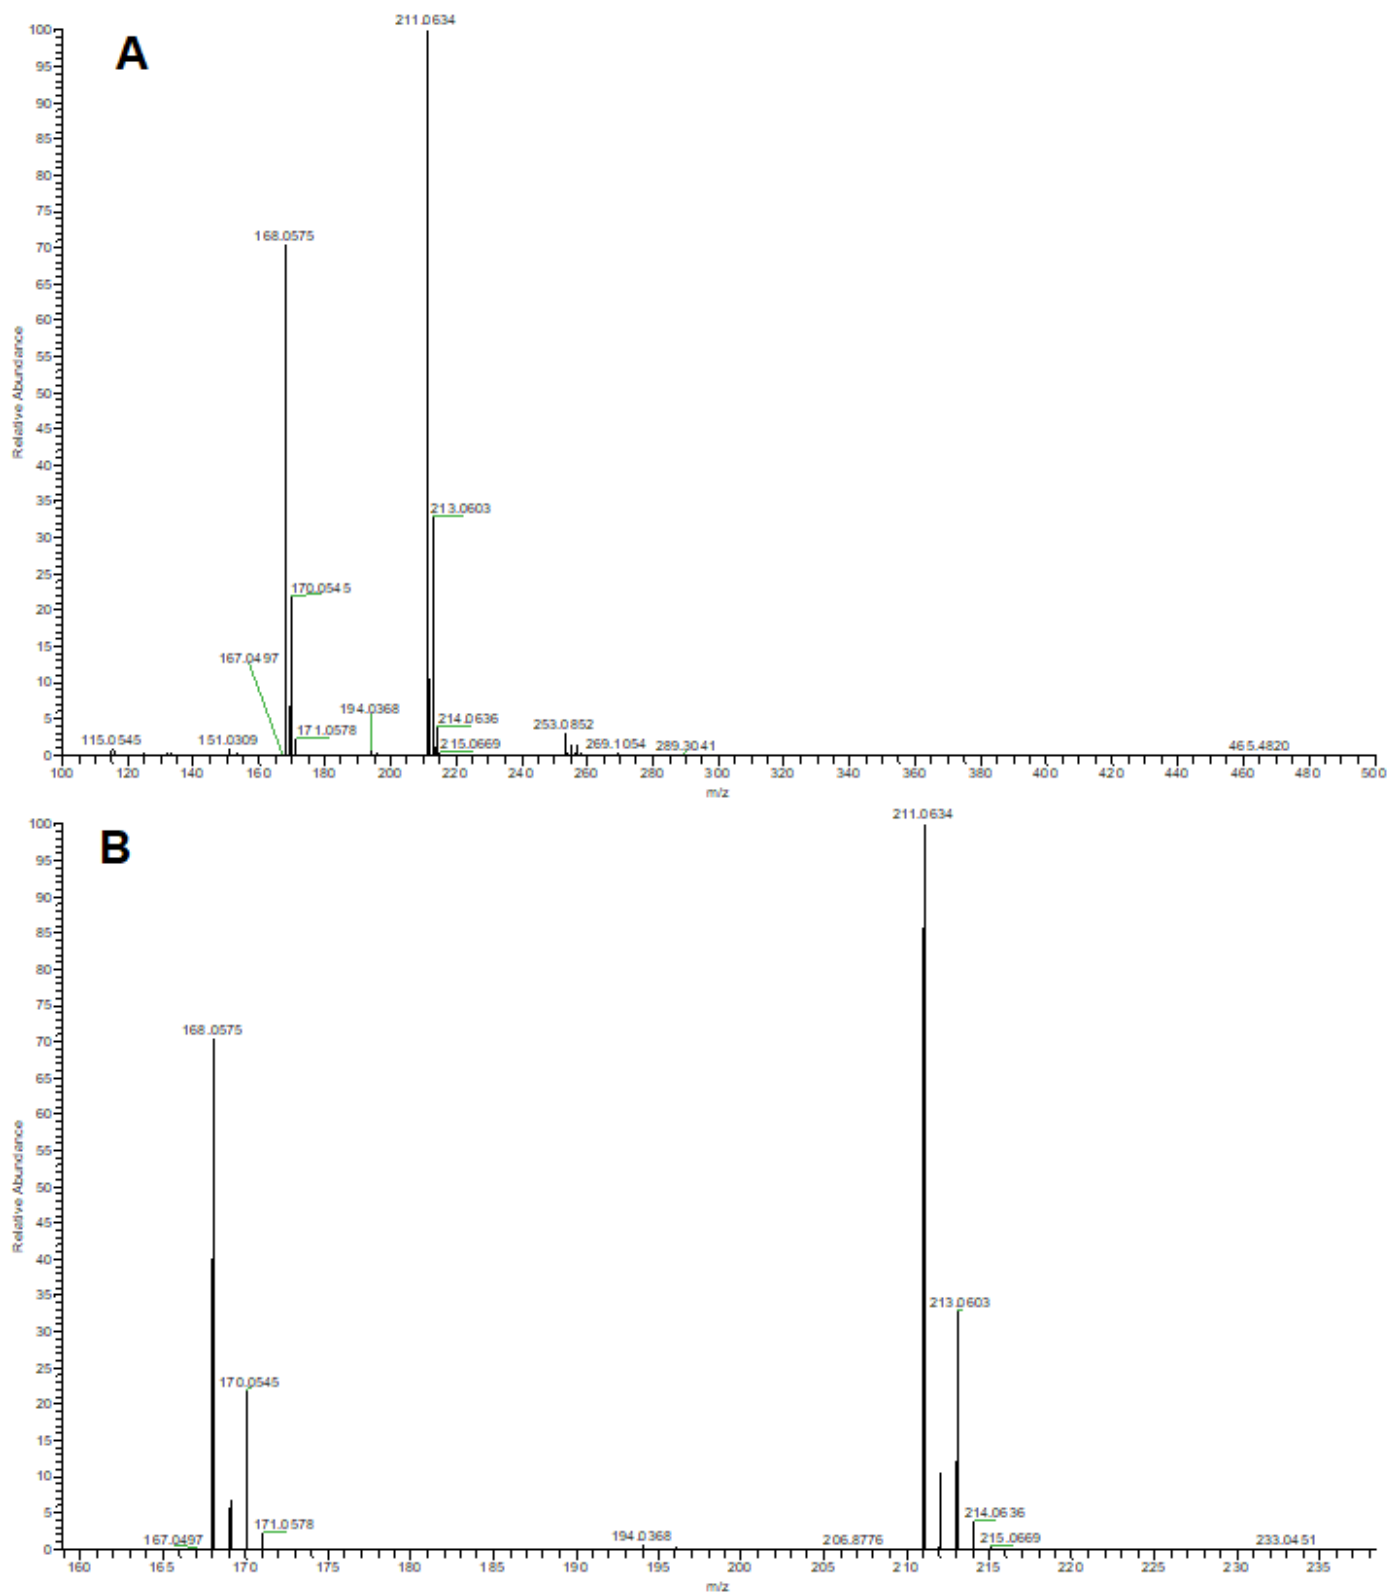

**Figure S24.** HESI positive mode full MS spectrum of 4C-MAR (A: full view,  $m/z$  100-500, B: detailed view,  $m/z$  160-240)

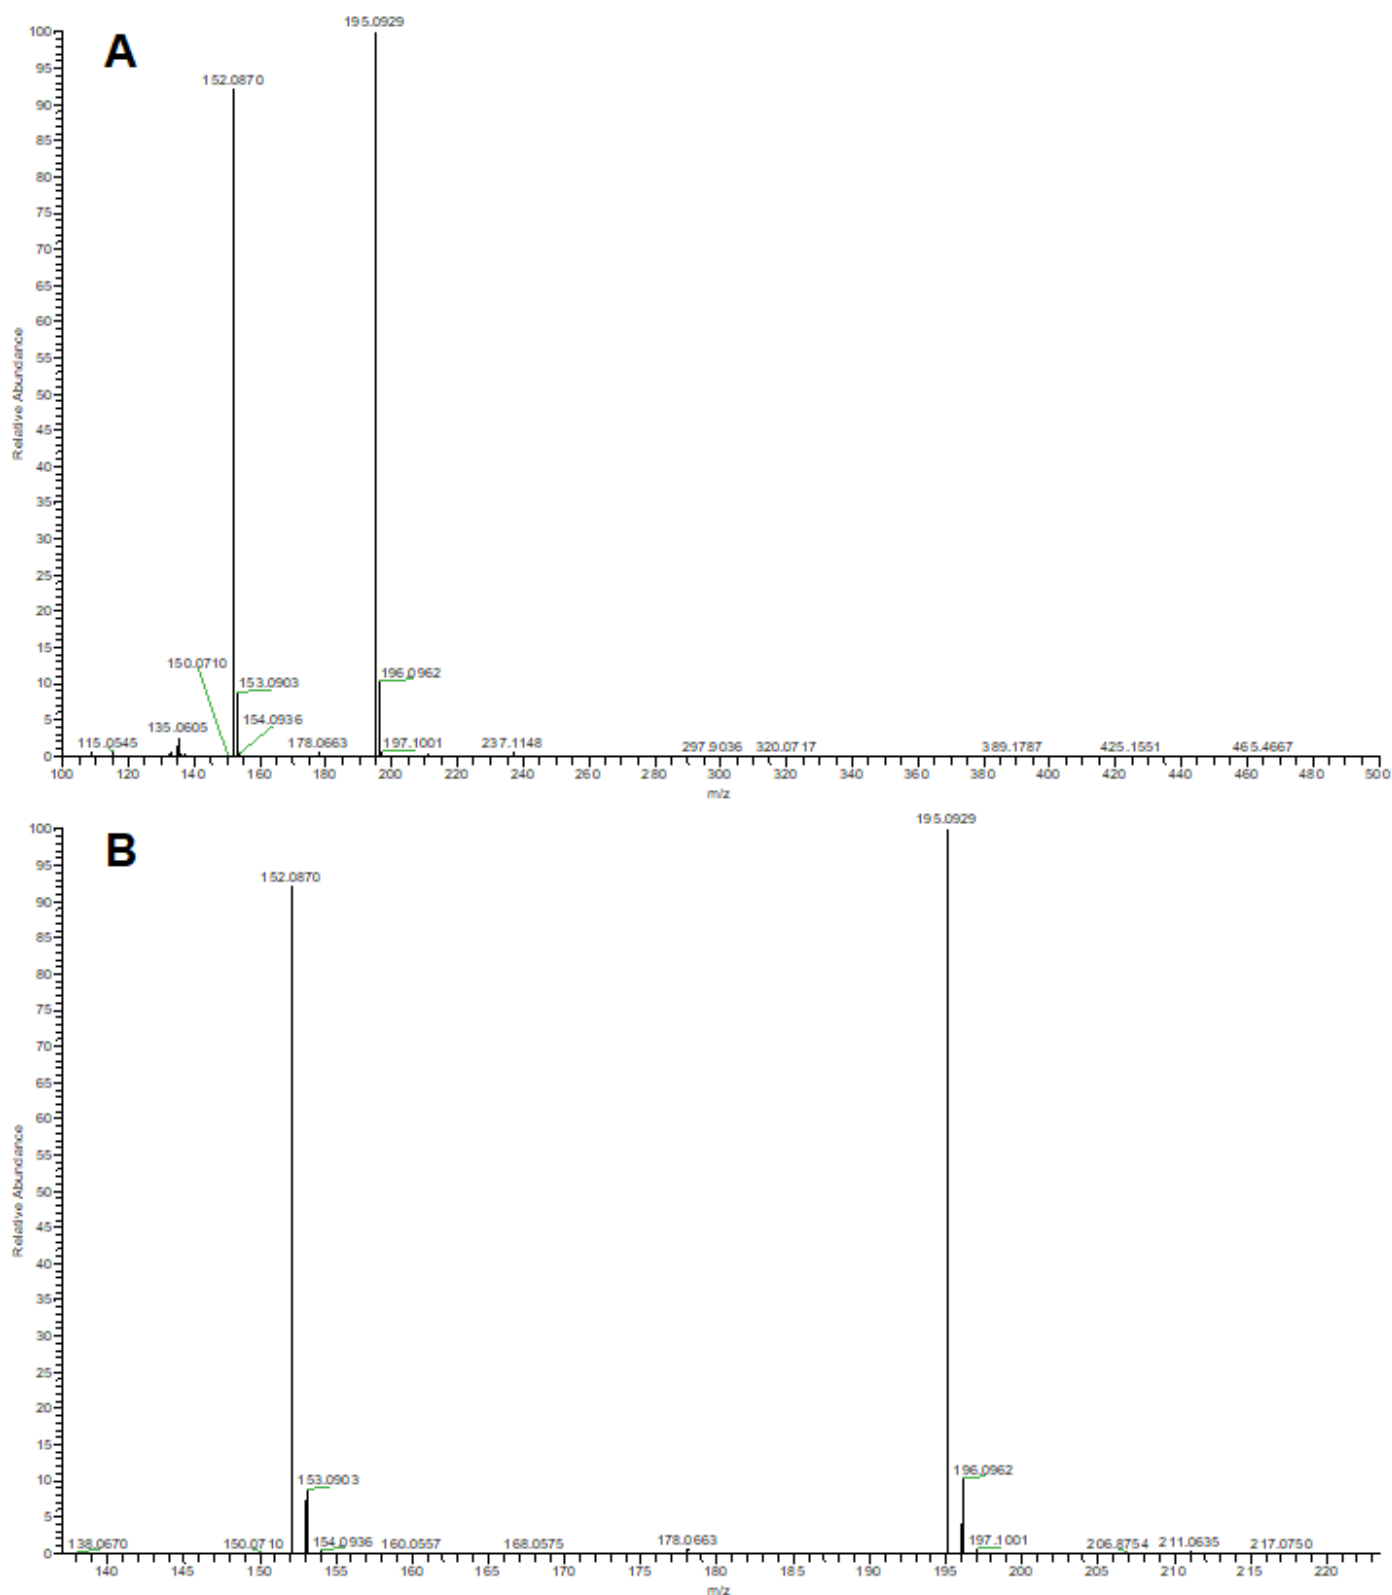

**Figure S25.** HESI positive mode full MS spectrum of 4F-MAR (A: full view,  $m/z$  100-500, B: detailed view,  $m/z$  140-220)

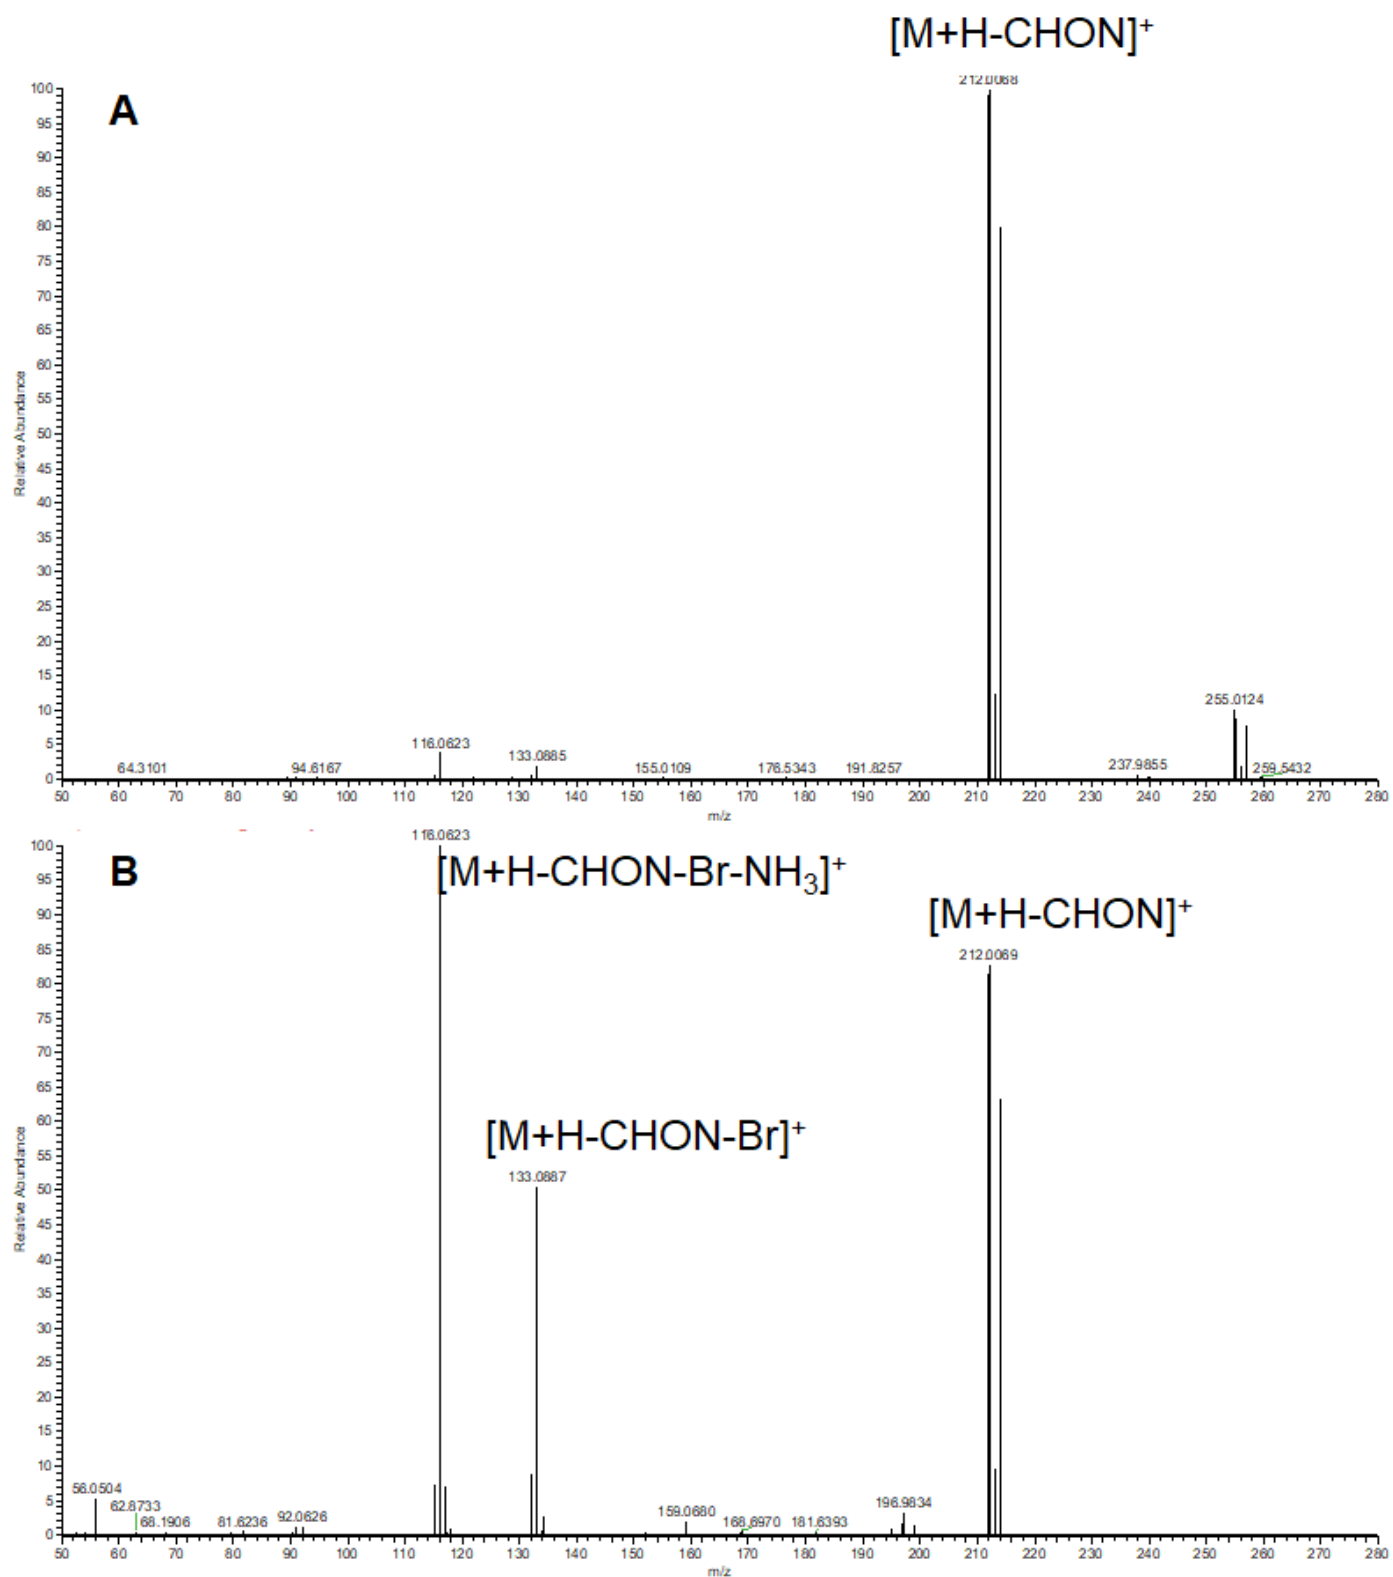

**Figure S26.** HESI positive mode MS/MS spectrum of 4B-MAR (A: normalized collision energy 18, B: normalized collision energy 45)

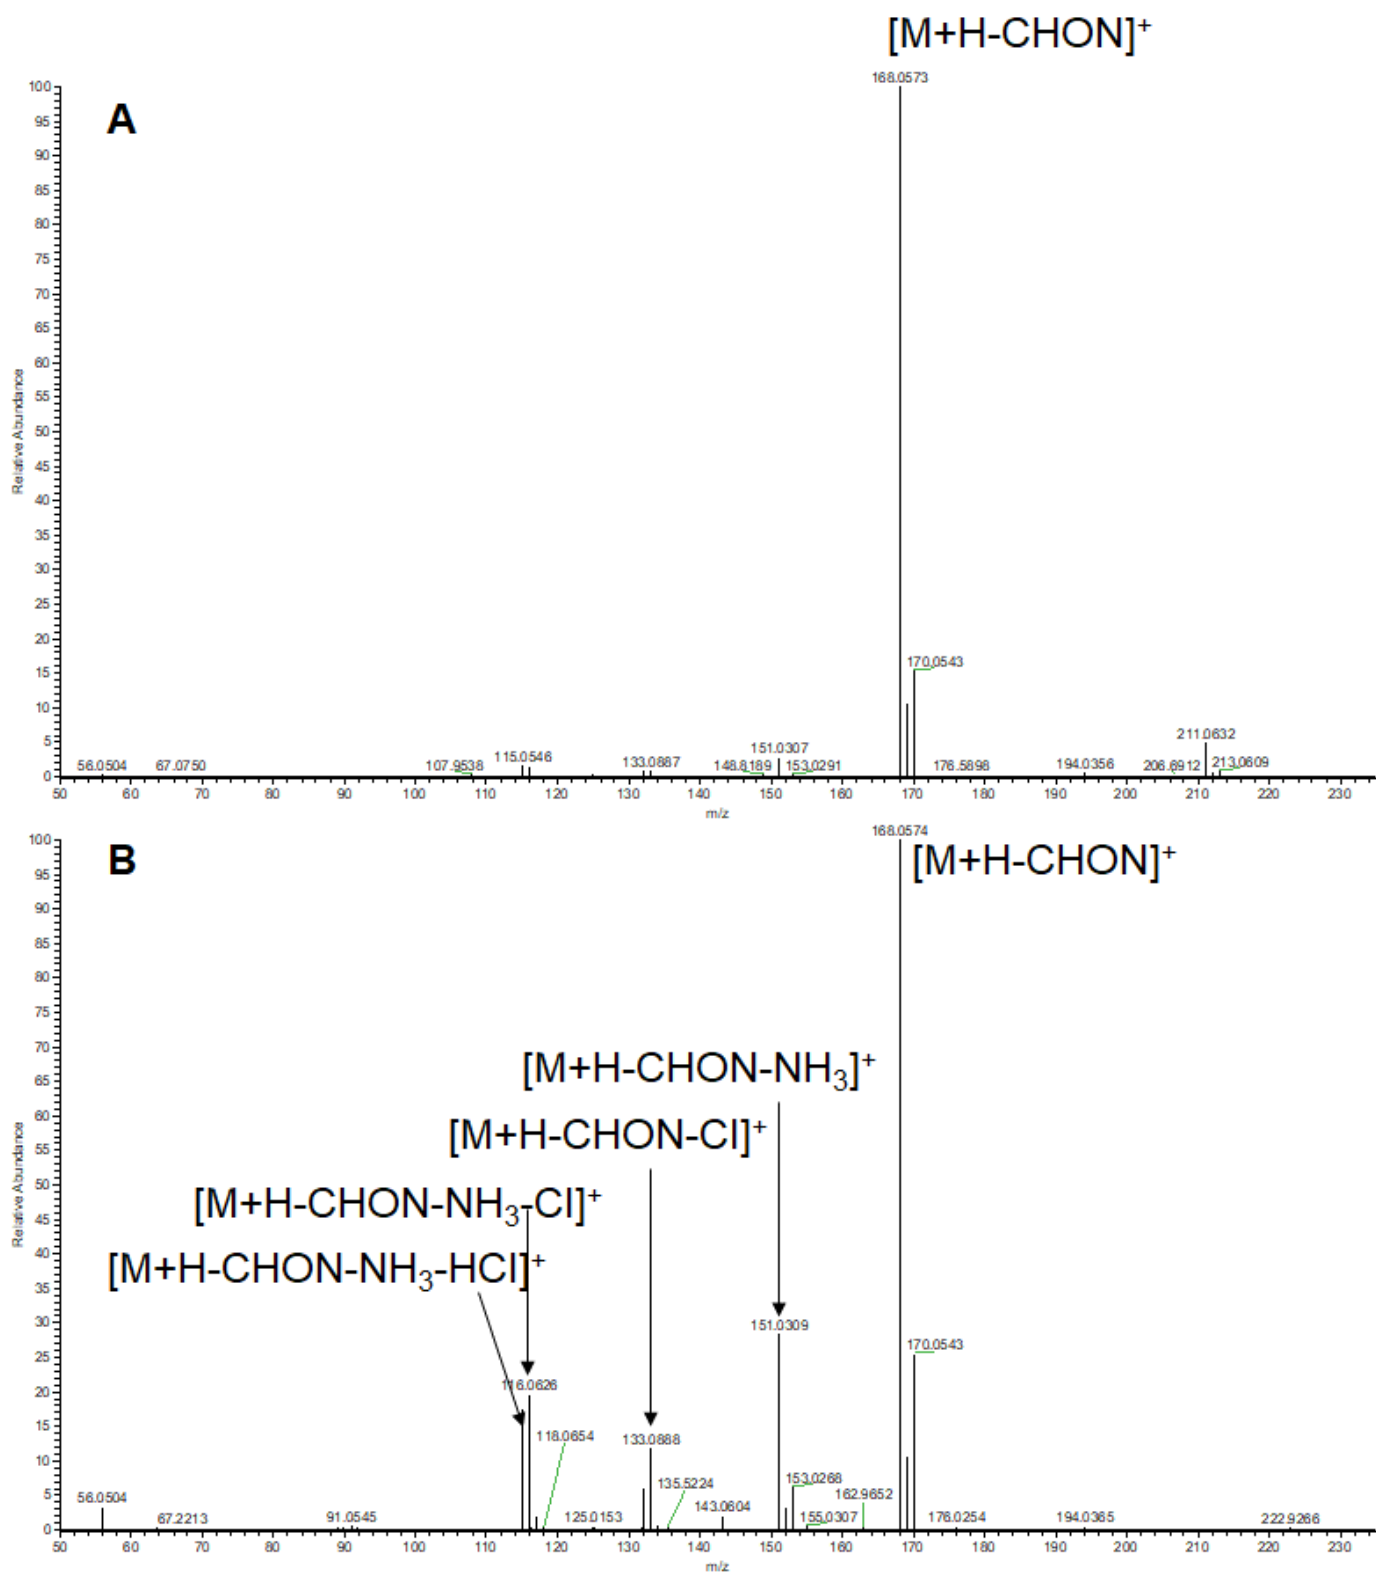

Figure S27. HESI positive mode MS/MS spectrum of 4C-MAR (A: normalized collision energy 18, B: normalized collision energy 45)

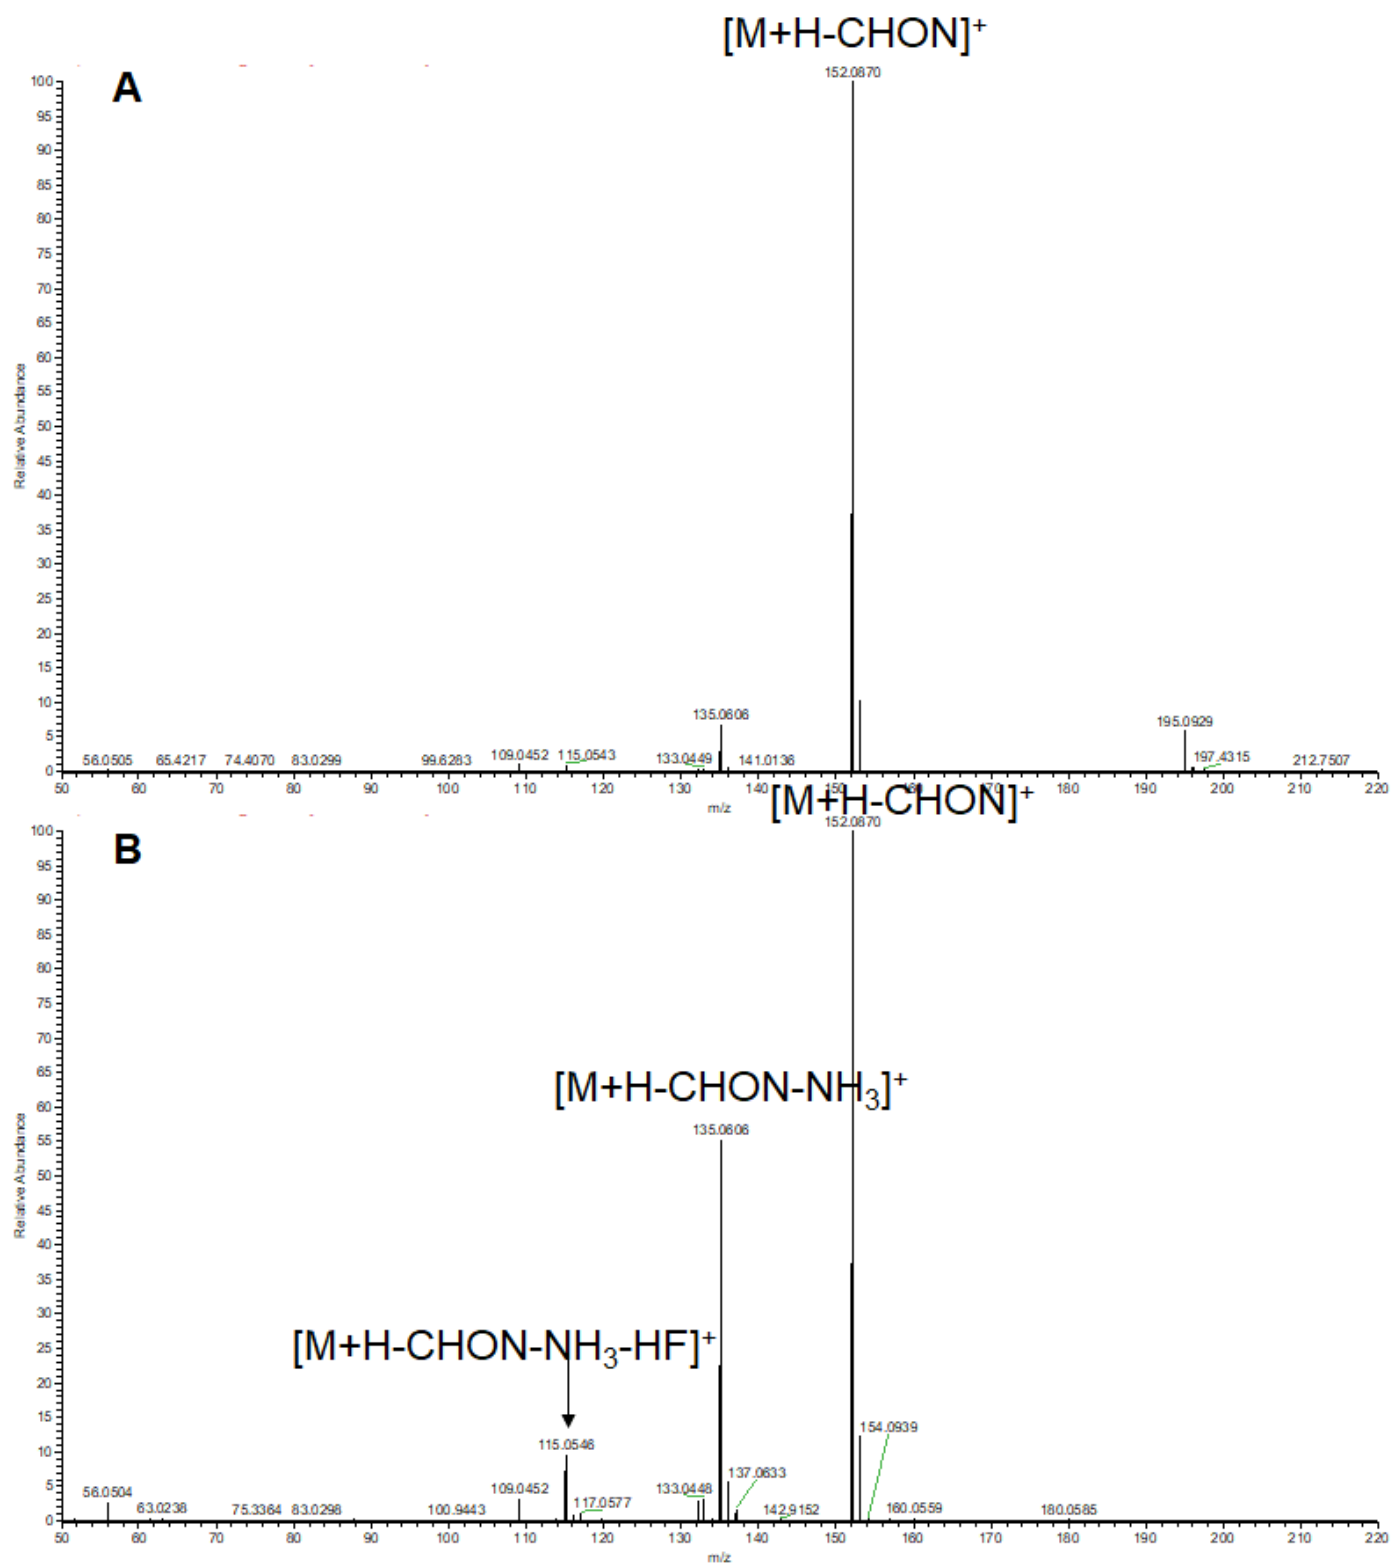

**Figure S28.** HESI positive mode MS/MS spectrum of 4F-MAR (A: normalized collision energy 18, B: normalized collision energy 45)
